# Supplementary material for: Crystalline-state chemiluminescence reactions of two-fluorophore-linked adamantylideneadamantane 1,2-dioxetane isomers accompanied by solid-to-solid phase transitions
Source: Royal Society of Chemistry journal article supplement (doi:10.1039/d2ce00266c), 2022-01-01
Supplement: d2ce00266c1.pdf [file d2ce00266c1.pdf]

## Electronic supplementary information (ESI)

# Crystalline-state chemiluminescence reactions of two-fluorophore-linked adamantylideneadamantane 1,2-dioxetane isomers accompanied by solid-to-solid phase transitions

Chihiro Matsushashi,<sup>a</sup> Hironaga Oyama,<sup>b</sup> Hidehiro Uekusa,<sup>b</sup> Ayana Sato-Tomita,<sup>c</sup> Kouhei Ichiyanagi,<sup>d</sup> Shojiro Maki<sup>a</sup> and Takashi Hirano\*<sup>a</sup>

<sup>a</sup> Department of Engineering Science, Graduate School of Informatics and Engineering, The University of Electro-Communications, Chofu, Tokyo 182-8585, Japan

<sup>b</sup> Department of Chemistry, Tokyo Institute of Technology, Ookayama 2-12-1, Meguro-ku, Tokyo, 152-8551, Japan

<sup>c</sup> Division of Biophysics, Department of Physiology, Jichi Medical University, Shimotsuke, Tochigi 329-0498, Japan

<sup>d</sup> Institute of Materials Structure Science, High Energy Accelerator Research Organization (KEK), Tsukuba, Ibaraki, 305-0801, Japan

### Table of contents

|                                                                                                                                   |          |
|-----------------------------------------------------------------------------------------------------------------------------------|----------|
| 1. General methods                                                                                                                | Page S2  |
| 2. Synthesis                                                                                                                      | Page S4  |
| 3. Reaction analysis of the thermal decompositions of <i>cis-syn-1</i> and <i>cis-anti-1</i> in the crystalline state             | Page S10 |
| 4. Time course changes of CL emission intensities and morphological changes for the crystals of <i>cis-syn-1</i> heated at 130 °C | Page S12 |
| 5. Fluorescence of fluorophore-linked 2-adamantanone <b>2</b> , <i>cis-syn-1</i> and <i>cis-anti-1</i>                            | Page S13 |
| 6. Fluorescence lifetime measurements of fluorophore-linked 2-adamantanone <b>2</b>                                               | Page S15 |
| 7. X-ray crystallographic analyses of <i>cis-syn-1</i> and <b>2</b>                                                               | Page S16 |
| 8. DFT calculations of a fluorophore moiety                                                                                       | Page S17 |
| 9. TG-DTA data of <i>cis-syn-1</i>                                                                                                | Page S20 |
| 10. Observation of a movement of a heated single crystal of <i>cis-syn-1</i>                                                      | Page S21 |
| 11. <sup>1</sup> H- and <sup>13</sup> C-NMR spectra                                                                               | Page S23 |
| References                                                                                                                        | Page S36 |

## 1. General methods

CL spectra were measured with a Hamamatsu Photonics PMA-12 spectrophotometer for UV/visible measurement (C10027) (exposure time: 10 s for heating at 160 °C and 60 s for heating at 130 °C). Sample weights were c.a. 0.5 mg. Melting points were measured with a Yanaco MP-500P, whose heating stage was also used for CL measurements. IR spectra were measured with a JASCO FT/IR-4600 with an ATR attachment. High-resolution mass spectra (HRMS) were obtained with a JEOL JMS-T100LC mass spectrometer for electro-spray ionization (ESI) and a JEOL JMS-S300 mass spectrometer for matrix assisted laser desorption ionization (MALDI) using *trans*-2-[3-(4-*tert*-butylphenyl)-2-methyl-2-propenylidene]malononitrile (DCTB) with NaI and  $\alpha$ -cyano-4-hydroxycinnamic acid (CHCA) as matrices.  $^1\text{H}$  and  $^{13}\text{C}$  NMR spectra were recorded on a JEOL ECA-500 instrument (500 MHz for  $^1\text{H}$  and 126 MHz for  $^{13}\text{C}$ ). Fluorescence spectra were measured with a Hamamatsu Photonics Quantaaurus-QY absolute PL quantum yields measurement system with determining fluorescence quantum yields. Fluorescence life times were measured with a Hamamatsu Photonics Quantaaurus-TauC11367. For crystal structure determination, single crystals of *cis-syn-1*, *cis-anti-1* and *trans-1* were obtained by a vapor diffusion technique using solutions in dichloromethane as a good solvent and *n*-hexane as a poor solvent. Unfortunately, the crystallography of *cis-anti-1* and *trans-1* were not successful. The crystal of *cis-anti-1* was fiber crystal. It wasn't possible to obtain that of *trans-1* because of its instability. Single crystal X-ray diffraction data for *cis-syn-1* was collected on beamline NW12A with PILATUS3 S 2M at the Photon Factory (Tsukuba, Japan) with synchrotron radiation ( $\lambda = 0.750 \text{ \AA}$ ). Single crystal X-ray diffraction data for **2** was collected on a Rigaku XtaLAB AFC10 diffractometer with Mo K $\alpha$  radiation ( $\lambda = 0.71073 \text{ \AA}$ ). The data were collected at 95 K for *cis-syn-1* and at 100 K for **2**. XDS<sup>1</sup> was used for *cis-syn-1* and CrysAlisPro 1.171.42.35a (Rigaku Oxford Diffraction, 2021) was used for **2** to perform empirical absorption correction using spherical harmonics, implemented scaling algorithms in CORRECT and SCALE3 ABSPACK, respectively. The single crystal structure of **2** was solved by OLEX2<sup>2</sup> software program. The initial structures were solved by dual space algorithm implemented in *SHELXT*<sup>3</sup> and refined on  $F_0^2$  with *SHELXL*-2017/1 for *cis-syn-1* and *SHELXL*-2018/3 for **2**.<sup>4</sup> All of the non-hydrogen atoms were refined anisotropically. Hydrogen atoms were geometrically generated and refined with a riding model and their displacement parameters ( $U_{\text{iso}}$ ) were fixed to  $1.2U_{\text{eq}}$  of the parent carbon atom. The single crystal of *cis-syn-1* was found to contain solvent molecules. Several peaks could not be assigned to any molecules due to a disorder. PLATON/SQUEEZE<sup>5</sup> method was used to treat a solvent disorder volume, which removed the contributions of some 366 electrons from the unit-cell contents. Crystallographic data are summarized in Table S5. CCDC 2132563 and 2128839 contains the supplementary crystallographic data for this paper (*cis-syn-1* and **2**, respectively). These data can be obtained free of charge from The Cambridge Crystallographic Data Centre via [www.ccdc.cam.ac.uk/structures](http://www.ccdc.cam.ac.uk/structures). Synchrotron powder X-ray diffraction data of *cis-syn-1* and *cis-anti-1* were recorded on beamline NW12A with PILATUS3 S 2M at the Photon Factory (Tsukuba, Japan). The crystals of *cis-syn-1* and *cis-anti-1* were gently ground and enclosed in Lindemann borosilicate glass capillaries ( $\phi$  0.5 mm), that were fixed to a brass pin of a sample holder with an epoxy glue. The

sample holder was attached to a goniometer and slowly rotated. The crystal samples were rotated at 2 rpm and heated by N<sub>2</sub> gas flow heated at 130 or 160 °C with collecting X-ray diffraction data. 60 Diffraction images were collected during the measurement of each sample, and the exposure time was set to 30 seconds. Density functional theory (DFT) calculations were performed with the Gaussian 16 program (Rev. D.01).<sup>6</sup> DFT includes the B3LYP function with the 6-31G(d) basis set.<sup>7-9</sup> The molecular structures of all compounds were optimized by DFT calculations, to give information on the ground state structures and the molecular orbitals. Using the optimized structures, time-dependent (TD)-DFT calculations were carried out to give the properties of the electronic transitions including the S<sub>0</sub>→S<sub>1</sub> transitions. Molecular graphics were made with GaussView, Version 6.1.<sup>10</sup> Thermogravimetry-differential thermal analysis (TG-DTA) of *cis-syn-1* was measured with a Rigaku TG8120. Pictures of the single crystals of *cis-syn-1* were taken by a digital camera of an optical microscope and dimensions of the crystals were determined with the ImageJ software. A morphological change of a heated single crystal of *cis-syn-1* was also taken by the digital camera every 2 s. CL emission from a heated single crystal of *cis-syn-1* was observed with a sCMOS camera (exposure time: 20s) attached to the optical microscope. A heating stage for observing a morphological change and CL emission of a heated single crystal of *cis-syn-1* was a MSA factory PN121-D controlled its temperature by a MSA factory PCC100G.

## 2. Synthesis

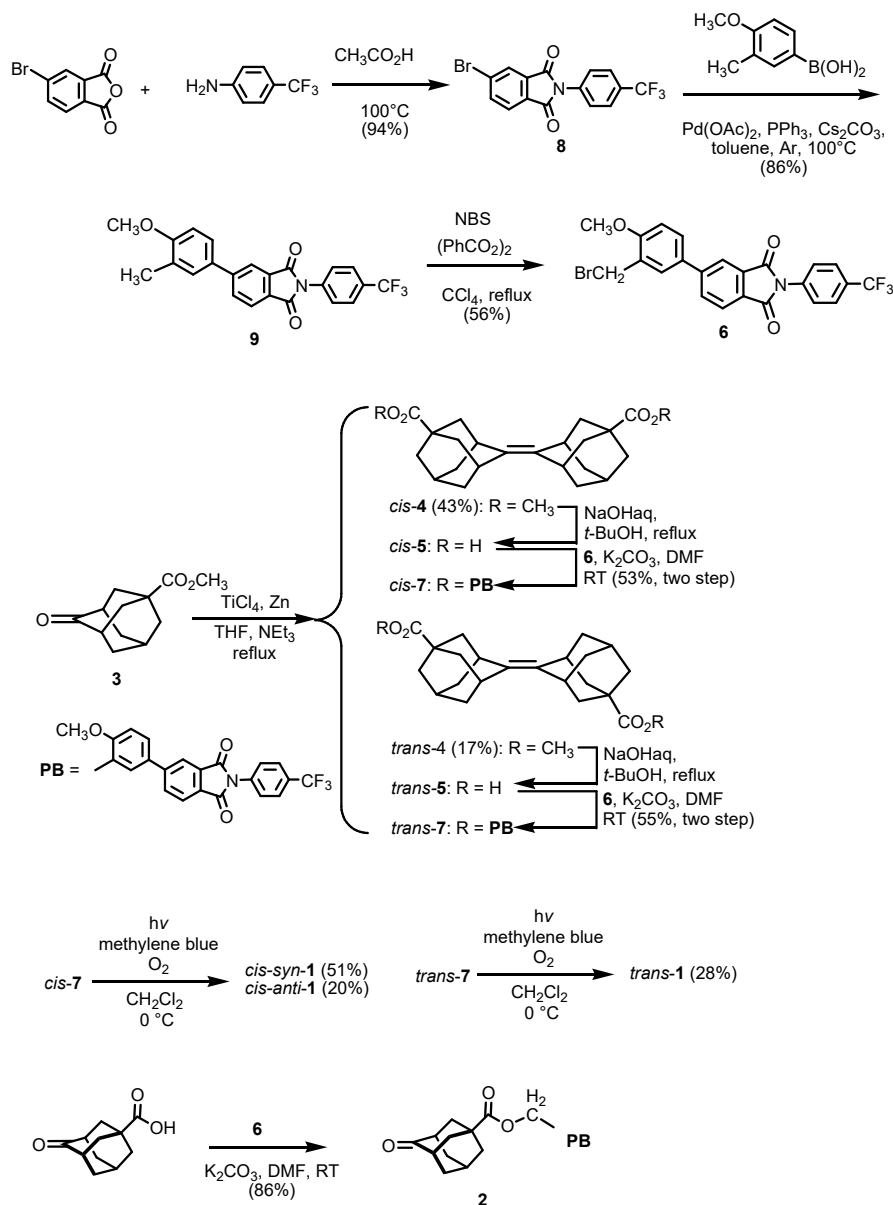

**Scheme S1.** Synthesis of the two-fluorophore-linked 1,2-dioxetanes **1** and 2-adamantanone **2**.

*5-Bromo-2-[4-(trifluoromethyl)phenyl]isoindoline-1,3-dione* (**8**).<sup>11</sup> A solution of 4-bromophthalic anhydride (10.1 g, 44.6 mmol) and 4-trifluoromethylaniline (6.9 mL, 54.9 mmol) in acetic acid (100 mL) was heated at 100 °C under Ar for 4.5 h. The reaction mixture was cooled and diluted with water to make white precipitates of the product. The precipitates were collected by vacuum filtration, washed with water and dried in vacuo, to give phthalimide **8** (15.5 g, 42.0 mmol, 94 %) as colorless powder. <sup>1</sup>H NMR (500 MHz, CDCl<sub>3</sub>) δ 8.12 (d, *J* = 1.7 Hz, 1 H), 7.97 (dd, *J* = 8.0, 1.7 Hz, 1 H), 7.85 (d, *J* = 8.0 Hz, 1 H), 7.78 (d, *J* = 8.0 Hz, 2 H), 7.63 (d, *J* = 8.6 Hz, 2 H). *m/z* (MALDI, CHCA) Found: 369.9679 and 371.9661 ([M+H]<sup>+</sup>). C<sub>15</sub>H<sub>8</sub>F<sub>3</sub>NO<sub>2</sub><sup>79</sup>Br and C<sub>15</sub>H<sub>8</sub>F<sub>3</sub>NO<sub>2</sub><sup>81</sup>Br require 369.9685 and 371.9666, respectively.

*5-(3-Methyl-4-methoxyphenyl)-2-[4-(trifluoromethyl)phenyl]isoindoline-1,3-dione (9)*. Palladium (II) acetate (124 mg, 0.55 mmol), triphenyl phosphine (702 mg, 2.68 mmol) and cesium carbonate (8.72 g, 26.8 mmol) were added to a solution of phthalimide **8** (5.04 g, 13.6 mmol) and 4-methoxy-3-methoxyphenylboronic acid (2.69g, 16.2 mmol) in toluene (250 mL). The solution was heated at reflux for 3 h under Ar. The reaction mixture was cooled and diluted with CHCl<sub>3</sub> and the filtrate was extracted with CHCl<sub>3</sub> (150 mL × 2) from the aqueous layer, and the organic layer was washed with brine (175 mL), dried over Na<sub>2</sub>SO<sub>4</sub> and concentrated in vacuo. The product was subjected to separation by silica gel column chromatography [*n*-hexane/CHCl<sub>3</sub> (from 1:1 to 1:3)], to give **9** (4.81 g, 11.7 mmol, 86 %) as colorless powder. mp 227–228 °C. <sup>1</sup>H-NMR (500 MHz, CDCl<sub>3</sub>) δ 8.15 (s, 1 H), 7.99 (d, *J* = 1.1 Hz, 2 H), 7.79 (d, *J* = 8.6 Hz, 2 H), 7.67 (d, *J* = 8.6 Hz, 2 H), 7.51 (m, 2 H), 6.96 (d, *J* = 8.0 Hz, 1 H), 3.91 (s, 3 H) and 2.32 (s, 3 H). <sup>13</sup>C-NMR (126 MHz, CDCl<sub>3</sub>) δ 166.97, 166.79, 158.83, 148.13, 135.06, 132.50, 132.36, 130.60, 129.7 (q), 129.60, 128.91, 127.74, 126.44, 126.22 (q), 125.95, 124.83 (q), 124.42, 121.83, 110.43, 55.51 and 16.43.  $\nu/\text{cm}^{-1}$  3200-2800 (w), 1777, 1708, 1606, 1514, 1382, 1324 and 1110. *m/z* (ESI) Found: 434.0980 ([M+Na]<sup>+</sup>). C<sub>22</sub>H<sub>16</sub>F<sub>3</sub>NO<sub>3</sub> requires 434.1024.

*5-(3-Bromomethyl-4-methoxyphenyl)-2-[4-(trifluoromethyl)phenyl]isoindoline-1,3-dione (6)*. A solution of phthalimide **9** (4.43 g, 10.8 mmol), NBS (2.52 g, 14.0 mmol) and benzoyl peroxide (251 mg, 0.54 μmol) in CCl<sub>4</sub> (550 mL) was heated at reflux for 8.5 h under Ar. The reaction was quenched by addition of a saturated sodium thiosulfate solution (300 mL) and the organic layer was washed with brine (200mL). The product was extracted with CHCl<sub>3</sub> (300 mL) from the aqueous layer, and the organic layer was washed with brine (200 mL). All of organic layer was dried over Na<sub>2</sub>SO<sub>4</sub> and concentrated in vacuo. The product was subjected to separation by silica gel column chromatography [*n*-hexane/CHCl<sub>3</sub> (from 1:1 to 1:5)], to give **6** (2.95 g, 6.03 mmol, 56 %) as pale yellow powder. mp 221.7–222.2 °C. <sup>1</sup>H-NMR (500 MHz, CDCl<sub>3</sub>) δ 8.14 (s, 1 H), 8.01 (d, *J* = 6.9 Hz, 1 H), 7.98 (dd, *J* = 7.7, 1.4 Hz, 1 H), 7.79 (d, *J* = 8.6 Hz, 2 H), 7.66-7.68 (m, 3 H), 7.63 (dd, *J* = 8.6, 2.3 Hz, 1 H), 7.03 (d, *J* = 8.6 Hz, 1 H), 4.63 (s, 2 H) and 3.97 (s, 3 H). <sup>13</sup>C-NMR (126 MHz, CDCl<sub>3</sub>) δ 166.80, 166.64, 158.30, 147.23, 134.97, 132.60, 132.42, 131.14, 129.82, 129.77 (q), 129.32, 129.10, 127.20, 126.42, 126.23 (q), 124.52, 123.81 (q), 121.86, 111.67, 55.92 and 28.29.  $\nu/\text{cm}^{-1}$  3100-2850(w), 1777, 1707, 1606, 1513, 1385, 1323, 1124 and 1112. *m/z* (ESI) Found: 490.0247 and 492.0225 ([M+H]<sup>+</sup>). C<sub>23</sub>H<sub>16</sub>F<sub>3</sub>NO<sub>3</sub><sup>79</sup>Br and C<sub>23</sub>H<sub>16</sub>F<sub>3</sub>NO<sub>3</sub><sup>81</sup>Br require 490.0266 and 492.0245, respectively.

*cis- And trans-5,5'-dicarbomethoxyadamantylideneadamantanes (cis- and trans-4)*. TiCl<sub>4</sub> (9.0 mL, 82 mmol) was added dropwise to anhydrous THF (160 mL) containing powdered zinc (10.8 g, 165 mmol) in an ice bath under Ar. After heating the mixture under reflux for 1.5 h, triethylamine (22 mL, 158 mmol) was added to the titanium-zinc mixture and stirring at 5 min, following a solution of 5-(merthoxycarbonyl)-2-adamantanone<sup>12,13</sup> (7.4 g, 35.5 mmol) in anhydrous THF (45 mL) was added and the solution was refluxed under Ar for 19 h. The reaction was quenched by the addition of a 10% K<sub>2</sub>CO<sub>3</sub> aqueous solution (250 mL), and precipitates were filtered off and washed with ethyl acetate

(200 mL × 3). The filtrate was washed with brine (100 mL × 3), dried over Na<sub>2</sub>SO<sub>4</sub> and concentrated in vacuo. The product was purified by silica gel column chromatography (1:5 ethyl acetate/*n*-hexane to ethyl acetate), to yield alkene *cis*-**4** (2.94 g, 7.65 mmol, 43 %, R<sub>f</sub> = 0.38) as colorless needles and alkene *trans*-**4** (1.15 g, 2.99 mmol, 17%, R<sub>f</sub> = 0.21) as colorless powder.

*cis*-**4**. mp 134.6–135.4 °C. <sup>1</sup>H-NMR (500 MHz, CDCl<sub>3</sub>) δ 3.65 (s, 6 H), 3.00 (s, 4 H), 2.08 (quint, *J* = 3.3 Hz, 2 H), 1.96 (m, 8 H), 1.82 (m, 8 H) and 1.66 (m, 4 H). <sup>13</sup>C-NMR (126 MHz, CDCl<sub>3</sub>) δ 177.88, 132.26, 51.60, 40.97, 40.46, 38.42, 31.42 and 28.23. ν/cm<sup>-1</sup> 2922, 2898, 2850, 1724, 1689, 1448, 1435, 1233, 1182 and 1072. *m/z* (ESI) Found: 407.2190 ([M+Na]<sup>+</sup>). C<sub>24</sub>H<sub>32</sub>O<sub>4</sub>Na requires 407.2198.

*trans*-**4**. mp 209.3–210.3 °C. <sup>1</sup>H-NMR (500 MHz, CDCl<sub>3</sub>) δ 7.26 (s, 1 H), 3.65 (s, 6 H), 3.00 (s, 4 H), 2.07 (qt, *J* = 2.9 Hz, 2 H), 1.97 (m, 8 H), 1.82 (m, 8 H) and 1.65 (m, 4 H). <sup>13</sup>C-NMR (126 MHz, CDCl<sub>3</sub>) δ 177.89, 132.26, 51.61, 40.99, 40.52, 38.42, 38.36, 31.42, 28.21. ν/cm<sup>-1</sup> 2951, 1908, 2848, 1720, 1433, 1247 and 1074. *m/z* (ESI) Found: 407.2166 ([M+Na]<sup>+</sup>). C<sub>24</sub>H<sub>32</sub>O<sub>4</sub>Na requires 407.2198.

*cis*-5,5'-Dicarboxyadamantylideneadamantane (*cis*-**5**). A 1.0 M NaOH aqueous solution (10 mL) was added to a solution of *cis*-**4** (1.12 g, 2.91 mmol) in *t*-BuOH (30 mL), and the resulting mixture was heated at 100°C for 5 h. After removing the solvents, a 1 M HCl aqueous solution was added to the residue in an ice bath. White precipitates were collected by filtration, washed with water and vacuum dried, to give *cis*-**5** (1.55 g) as a crude powder product. Because a <sup>1</sup>H-NMR spectrum of the product showed the signals of *cis*-**5** without any impurity, we directly used the product for the next reaction. mp 300 °C (decomp.). <sup>1</sup>H-NMR (500 MHz, DMSO-*d*<sub>6</sub>) δ 11.98 (brs, 1 H), 2.96 (brs, 4 H), 2.02 (brs, 2 H), 1.90 (m, 8 H), 1.77 (m, 4 H), 1.70 (m, 4 H) and 1.57 (m, 4 H). <sup>13</sup>C-NMR (126 MHz, DMSO-*d*<sub>6</sub>) δ 178.00, 131.78, 132.37, 40.19, 39.98, 39.81, 39.65, 39.49, 37.94, 37.80, 30.75 and 27.56. ν/cm<sup>-1</sup> 3200-2400 (br, w), 2905, 2849, 1686, 1445, 1288, 1262, 1087 and 956. *m/z* (ESI) Found: 355.1881 ([M-H]<sup>-</sup>). C<sub>22</sub>H<sub>27</sub>O<sub>4</sub> requires 355.1909.

*trans*-5,5'-Dicarboxyadamantylideneadamantane (*trans*-**5**). A 1.0 M NaOH aqueous solution (10 mL) was added to a solution of *trans*-**4** (622 mg, 1.62 mmol) in *t*-BuOH (25 mL), and the resulting mixture was heated at 100°C for 4.5 h. After removing the solvents, a 1 M HCl aqueous solution was added to the residue in an ice bath. White precipitates were collected by filtration, washed with water and vacuum dried, to give *trans*-**5** (514 mg, 1.44 mmol, 89%) as colorless powder. mp 300 °C (decomp.). <sup>1</sup>H-NMR (500 MHz, DMSO-*d*<sub>6</sub>) δ 12.01 (brs, 1 H), 2.96 (brs, 4 H), 2.02 (brs, 2 H), 1.89 (m, 8 H), 1.77 (m, 4 H) and 1.57 (m, 4 H). <sup>13</sup>C-NMR (126 MHz, DMSO-*d*<sub>6</sub>) δ 178.00, 131.79, 40.19, 39.99, 39.82, 39.65, 39.39, 37.95, 37.90, 30.75 and 27.56. ν/cm<sup>-1</sup> 3200-2250 (br, w), 2902, 2847, 1683, 1445, 1412, 1088 and 953. *m/z* (ESI) Found: 355.1860 ([M-H]<sup>-</sup>). C<sub>22</sub>H<sub>27</sub>O<sub>4</sub> requires 355.1909.

*cis*-5,5'-Di{1-methoxy-4-[4-(trifluoromethyl)phenyl]isoindoline-1,3-dionylbenzyloxycarbonyl}adamantylideneadamantane (*cis*-**7**). A solution of *cis*-**5** (260 mg, crude), bromide **7** (392 mg, 0.80

mmol) and  $K_2CO_3$  (282 mg, 2.04 mmol) in anhydrous DMF (25 mL) was stirred at room temperature for 30 h under Ar. The solution was diluted with water (150 mL) and the product was extracted with the mixed solvent (1:4 ethyl acetate/*n*-hexane, 180 mL  $\times$  4). The organic layer was washed with brine (45 mL  $\times$  4), dried over  $Na_2SO_4$  and concentrated in vacuo. The crude product was purified by silica gel flush chromatography (from 76:24 to 55:45 ethyl acetate/*n*-hexane), to yield alkene precursor *cis*-**7** (301 mg, 53%) as colorless powder. mp 132.7–133.4 °C.  $^1H$ -NMR (500 MHz,  $CDCl_3$ )  $\delta$  8.09 (s, 2 H), 7.97 (d,  $J = 8.0$  Hz, 2 H), 7.93 (dd,  $J = 8.0, 1.7$  Hz, 2 H), 7.77 (d,  $J = 8.6$  Hz, 5 H), 7.65 (d,  $J = 8.0$  Hz, 5 H), 7.59–7.62 (m, 4 H), 6.99 (d,  $J = 8.0$  Hz, 2 H), 5.19 (s, 4 H), 3.89 (s, 6 H), 3.02 (s, 4 H), 2.10 (s, 2 H), 2.03 (d,  $J = 12.6$  Hz, 8 H), 1.87 (m, 4 H), 1.82 (m, 4 H) and 1.66 (m, 4 H).  $^{13}C$ -NMR (126 MHz,  $CDCl_3$ )  $\delta$  177.03, 166.77, 166.66, 158.24, 147.64, 135.01, 132.46, 132.39, 132.27, 130.72, 129.71 (q), 129.13, 128.14, 127.82, 126.38, 126.19 (q), 125.92, 124.47, 123.81 (q), 121.76, 111.04, 61.15, 55.67, 41.12, 40.47, 38.48, 38.45, 31.41 and 28.21.  $\nu/cm^{-1}$  2903, 2848, 1776, 1715, 1607, 1515, 1365, 1322, 1117, 1065 and 1019.  $m/z$  (MALDI, DCTB-NaI) Found: 1197.3728 ( $[M+Na]^+$ ).  $C_{68}H_{56}F_6N_2O_{10}Na$  requires 1197.3731.

*trans*-5,5'-Di{1-methoxy-4-[4-(trifluoromethyl)phenyl]isoindoline-1,3-dionylbenzyloxycarbonyl}adamantylideneadamantane (*trans*-**7**). A solution of *trans*-**5** (67 mg, 0.19 mmol), bromide **7** (155 mg, 0.32 mmol) and  $K_2CO_3$  (117 mg, 0.84 mmol) in anhydrous DMF (10 mL) was stirred for 30 h at room temperature under Ar. The solution was diluted with water (25 mL) and the product was extracted with  $CHCl_3$  (40 mL  $\times$  4). The organic layer was washed with brine (50 mL  $\times$  2), dried over  $Na_2SO_4$  and concentrated in vacuo. The crude product was purified by silica gel column chromatography (1:50 ethyl acetate / $CHCl_3$ ), to yield alkene precursor *trans*-**7** (108 mg, 58%) as colorless powder. mp 131.3–135.3 °C.  $^1H$ -NMR (500 MHz,  $CDCl_3$ )  $\delta$  8.14 (s, 2 H), 8.00 (d,  $J = 7.4$  Hz, 2 H), 7.97 (dd,  $J = 7.7, 1.4$  Hz, 2 H), 7.78 (d,  $J = 8.0$  Hz, 4 H), 7.62–7.67 (m, 8 H), 7.02 (d,  $J = 9.2$  Hz, 2 H), 5.21 (s, 4 H), 3.92 (s, 6 H), 3.02 (brs, 4 H), 2.08 (brs, 2 H), 2.03 (brs, 6 H), 1.89 (brs, 4 H), 1.80 (brs, 4 H) and 1.64 (brs, 4 H).  $^{13}C$ -NMR (126 MHz,  $CDCl_3$ )  $\delta$  177.08, 166.80, 166.69, 158.28, 147.75, 135.00, 132.54, 132.44, 132.27, 130.80, 129.77 (q), 129.18, 128.20, 127.91, 126.41, 126.23 (q), 125.95, 124.49, 123.80 (q), 121.85, 111.06, 61.20, 55.69, 53.43, 41.14, 40.52, 38.48, 38.37, 31.41 and 28.20.  $\nu/cm^{-1}$  2903, 2850, 1777, 1715, 1608, 1516, 1365, 1322, 1117, 1065 and 1019.  $m/z$  (MALDI, DCTB-NaI) Found: 1197.3725 ( $[M+Na]^+$ ).  $C_{68}H_{56}F_6N_2O_{10}Na$  requires 1197.3731.

*cis*-*syn*- And *cis*-*anti*-5,5'-di{1-methoxy-4-[4-(trifluoromethyl)phenyl]isoindoline-1,3-dionylbenzyloxycarbonyl}adamantylideneadamantane 1,2-dioxetane (*cis*-*syn*-**1** and *cis*-*anti*-**1**). A solution of *cis*-**7** (300 mg, 0.26 mmol) and methylene blue (3.7 mg, 12  $\mu$ mol) in dichloromethane (350 mL) was cooled at 0 °C under  $O_2$  and irradiated with a 48 W LED lamp for 5 h. The solution was concentrated in vacuo. A  $^1H$ -NMR spectrum of the residue indicated that 49 mg of unreacted *cis*-**7** was recovered and conversion yields of *cis*-*syn*-**1** and *cis*-*anti*-**1** were 51 and 20%, respectively. The products were separated by silica gel column chromatography (from 1:50 to 1:20 ethyl acetate / $CH_2Cl_2$ ), to give *cis*-*syn*-**1** (42.4 mg,  $R_f = 0.30$ , 1:50 ethyl acetate / $CH_2Cl_2$ ) as colorless powder and

*cis-anti-1* (10 mg,  $R_f = 0.41$ , 1:50 ethyl acetate /CH<sub>2</sub>Cl<sub>2</sub>) as a colorless powder. Crystal samples were obtained by recrystallization from dichloromethane and *n*-hexane and stored at  $-20\text{ }^\circ\text{C}$  in a freezer.

*cis-syn-1*. <sup>1</sup>H-NMR (500 MHz, CDCl<sub>3</sub>)  $\delta$  8.12 (d,  $J = 1.1$  Hz, 2 H), 8.00 (d,  $J = 8.0$  Hz, 2 H), 7.96 (dd,  $J = 8.0, 1.7$  Hz, 2 H), 7.78 (d,  $J = 8.0$  Hz, 4 H), 7.66 (d,  $J = 8.6$  Hz, 4 H), 7.59-7.63 (m, 4 H), 7.01 (d,  $J = 8.6$  Hz, 2 H), 5.20 (s, 4 H), 3.91 (s, 6 H), 2.75 (brs, 4 H), 2.17-2.21 (m, 4 H), 2.08 (brs, 2 H), 1.92 (brs, 8 H) and 1.78-1.83 (brs, 8 H). <sup>13</sup>C-NMR (126 MHz, CDCl<sub>3</sub>)  $\delta$  176.25, 166.82, 166.69, 158.31, 147.70, 135.04, 132.62, 132.43, 130.84, 129.75(q), 129.19, 128.29, 128.04, 126.43, 126.21(q), 125.74, 124.55, 123.82(q), 121.86, 111.08, 94.33, 61.39, 55.69, 39.56, 38.60, 34.06, 33.57, 31.67 and 26.41.  $\nu/\text{cm}^{-1}$  2927, 2862, 1777, 1717, 1614, 1361, 1323, 1115, 1076, 1065, 836 and 742.  $m/z$  (MALDI, DCTB-NaI) Found: 1229.3632 ([M+Na]<sup>+</sup>). C<sub>68</sub>H<sub>56</sub>F<sub>6</sub>N<sub>2</sub>O<sub>12</sub>Na requires 1229.3630.

*cis-anti-1*. <sup>1</sup>H-NMR (500 MHz, CDCl<sub>3</sub>)  $\delta$  7.97 (d,  $J = 7.4$  Hz, 1 H), 7.92 (d,  $J = 0.9$  Hz, 1 H), 7.79 (d,  $J = 8.6$  Hz, 2 H), 7.76 (dd,  $J = 1.4, 7.7$  Hz, 1 H), 7.64 (d,  $J = 8.0$  Hz, 2 H), 5.27 (s, 2 H), 2.77 (brs, 2 H), 2.65 (brs, 2 H), 2.18-2.22 (m, 2 H), 1.84-1.99 (m, 14 H), 1.78 (brs, 1 H), 1.73 (brs, 2 H) and 1.57-1.60 (m, 4 H). <sup>13</sup>C-NMR (126 MHz, CDCl<sub>3</sub>)  $\delta$  176.17, 166.67, 166.57, 158.22, 147.46, 134.92, 132.46, 132.33, 130.70, 129.75 (q), 129.12, 128.26, 127.99, 127.03, 126.34, 126.19 (q), 125.58, 124.39, 122.78 (q), 121.67, 120.54, 111.03, 94.61, 61.41, 55.66, 39.95, 38.54, 36.19, 31.64, 31.49 and 26.18.  $\nu/\text{cm}^{-1}$  2939, 2914, 2860, 1779, 1712, 1613, 1511, 1379, 1322, 1114, 1085, 1064, 021, 839 and 745.  $m/z$  (MALDI, DCTB-NaI) Found: 1229.3635 ([M+Na]<sup>+</sup>). C<sub>68</sub>H<sub>56</sub>F<sub>6</sub>N<sub>2</sub>O<sub>12</sub>Na requires 1229.3630.

*trans-5,5'-Di{1-methoxy-4-[4-(trifluoromethyl)phenyl]isoindoline-1,3-dionyloxycarbonyl}adamantylideneadamantane 1,2-dioxetane (trans-1)*. A solution of alkene *trans-7* (300 mg, 0.26 mmol) and methylene blue (3.7 mg, 12  $\mu\text{mol}$ ) in dichloromethane (350 mL) was cooled at  $0\text{ }^\circ\text{C}$  under O<sub>2</sub> and irradiated with a 48 W LED lamp for 5 h. The solution was concentrated in vacuo. The products were separated by silica gel column chromatography (from 1:50 to 1:10 ethyl acetate /CH<sub>2</sub>Cl<sub>2</sub>), to yield *trans-1* (22 mg, conversion yield 28%) as a colorless powder with unreacted *trans-7* (43 mg). Crystal samples were obtained by recrystallization from dichloromethane and *n*-hexane and stored at  $-20\text{ }^\circ\text{C}$  in a freezer.

<sup>1</sup>H-NMR (500 MHz, CDCl<sub>3</sub>)  $\delta$  8.13 (s, 2H), 8.01 (d,  $J = 8.0$  Hz, 2 H), 7.95-7.98 (m, 2 H), 7.76-7.79 (m, 4 H), 7.59-7.67 (m, 8 H), 7.02 (t,  $J = 8.9$  Hz, 2 H), 5.22 (s, 2 H), 5.19 (s, 2 H), 3.91 (s, 3 H), 3.90 (s, 3 H), 2.73 (brs, 4 H), 2.17 (brs, 4 H), 1.87-2.01 (m, 12 H), 1.76 (brs, 4 H) and 1.52-1.58 (brs, 2 H).  $\nu/\text{cm}^{-1}$  2933, 2864, 1777, 1715, 1608, 1367, 1322, 1117, 1065, 1019, 837 and 744.  $m/z$  (MALDI, DCTB-NaI) Found: 1229.3635 ([M+Na]<sup>+</sup>). C<sub>68</sub>H<sub>56</sub>F<sub>6</sub>N<sub>2</sub>O<sub>12</sub>Na requires 1229.3630. <sup>13</sup>C-NMR couldn't measure because *trans-1* is unstable and decomposes over time.

*5-{1-Methoxy-4-[4-(trifluoromethyl)phenyl]isoindoline-1,3-dionylbenzyloxycarbonyl}-2-adamantanone (2)*. A solution of 5-carboxy-2-adamantanone (52 mg, 0.27 mmol), bromide **6** (123 mg, 0.25 mmol), and potassium carbonate (77 mg, 0.56 mmol) in anhydrous DMF (5 mL) was stirred at room temperature for 4 h under Ar. The reaction mixture was diluted by adding water (20 mL),



and the product was extracted with ethyl acetate (90 mL  $\times$  3). The organic layer was washed with brine (35 mL  $\times$  3), dried over Na<sub>2</sub>SO<sub>4</sub> and concentrated in vacuo. The product was purified by silica gel flush chromatography (from 32:68 to 53:47 ethyl acetate / *n*-hexane), to yield **2** (130 mg, 0.22 mmol, 86%) as colorless powder. mp 195.3–196.1 °C. <sup>1</sup>H-NMR (500 MHz, CDCl<sub>3</sub>)  $\delta$  8.14 (d,  $J$  = 1.1 Hz, 1 H), 8.02 (d,  $J$  = 7.4 Hz, 1 H), 7.97 (dd,  $J$  = 7.4, 1.7 Hz, 1 H), 7.79 (d,  $J$  = 8.6 Hz, 2 H), 7.67 (d,  $J$  = 9.0 Hz, 2 H), 7.65 (dd,  $J$  = 8.0, 2.5 Hz, 1 H), 7.60 (d,  $J$  = 2.9 Hz, 1 H), 7.04 (d,  $J$  = 8.6 Hz, 1 H), 5.24 (s, 2 H), 3.92 (s, 3 H), 2.60 (brs, 2 H), 2.21-2.27 (m, 5 H), 2.17 (brs, 2 H), 2.04-2.07 (m, 2 H) and 1.99 (brs, 2 H). <sup>13</sup>C-NMR (126 MHz, CDCl<sub>3</sub>)  $\delta$  216.67, 175.52, 166.83, 166.67, 158.48, 147.59, 134.98, 132.60, 132.47, 130.92, 129.80 (q), 129.27, 128.64, 128.52, 126.44, 126.23 (q), 125.33, 124.57, 123.81 (q), 121.89, 111.20, 61.88, 55.73, 45.78, 40.52, 40.17, 38.32, 37.86 and 27.28.  $\nu/\text{cm}^{-1}$  2926, 2862, 1774, 1716, 1603, 1518, 1360, 1320, 1116 and 1064.  $m/z$  (ESI) Found: 626.1786 ([M+H]<sup>+</sup>). C<sub>34</sub>H<sub>28</sub>F<sub>3</sub>NO<sub>6</sub>Na requires 626.1766.

### 3. Reaction analysis of the thermal decompositions of *cis-syn-1* and *cis-anti-1* in the crystalline state

A crystal samples of *cis-syn-1* (2.7 mg) was heated at 130 °C for 1.0 h. Similarly, a crystal sample of *cis-anti-1* (1.6 mg) was heated at 160 °C for 1.0 h. To each sample, 1.0  $\mu$ L of mesitylene (7.2  $\mu$ mol) was added as an internal standard, and the sample was dissolved in CDCl<sub>3</sub>. Then, <sup>1</sup>H NMR spectra of the solutions were measured. Consumed amounts of *cis-syn-1* and *cis-anti-1* were estimated with the integral values of the signals at  $\delta$  5.20 ppm (s, 4 H) for *cis-syn-1* and  $\delta$  5.11 ppm (s, 4 H) for *cis-anti-1* relative to that at  $\delta$  6.80 ppm (s, 3 H) for mesitylene (Table S1). The crystal sample of *cis-syn-1* contained 0.7 molecule of CH<sub>2</sub>Cl<sub>2</sub> and 0.3 molecule of *n*-hexane for each *cis-syn-1* molecule as observed by a <sup>1</sup>H-NMR measurement. Representative <sup>1</sup>H NMR spectra were shown in Figures S1 and S2, indicating the quantitative productions of **2** by the thermal decompositions of *cis-syn-1* and *cis-anti-1*.

**Table. S1** Analyses of thermal decompositions of *cis-syn-1* (130°C, 3.0 h) and *cis-anti-1* (160°C, 1.0 h) in the crystalline state.

| 1,2-dioxetane     | amount of the substrate                   |                                          | percentage of consumption (%) |
|-------------------|-------------------------------------------|------------------------------------------|-------------------------------|
|                   | before heating<br>( $\times 10^{-6}$ mol) | after heating<br>( $\times 10^{-6}$ mol) |                               |
| <i>cis-syn-1</i>  | 2.21                                      | 1.78                                     | 19.5                          |
| <i>cis-anti-1</i> | 1.29                                      | 0.84                                     | 34.8                          |

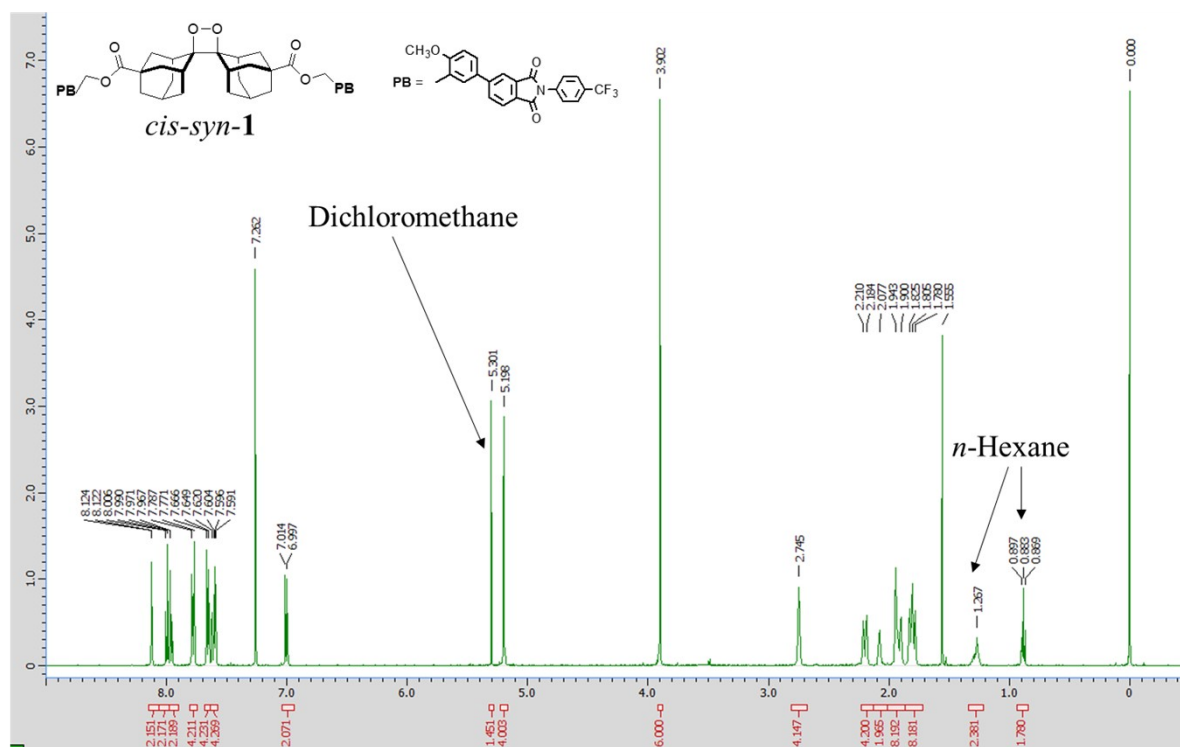

**Fig. S1** <sup>1</sup>H NMR spectrum of a solution of *cis-syn-1* in CDCl<sub>3</sub> before heating.



#### 4. Time course changes of CL emission intensities and morphological changes for the crystals of *cis-syn-1* heated at 130 °C

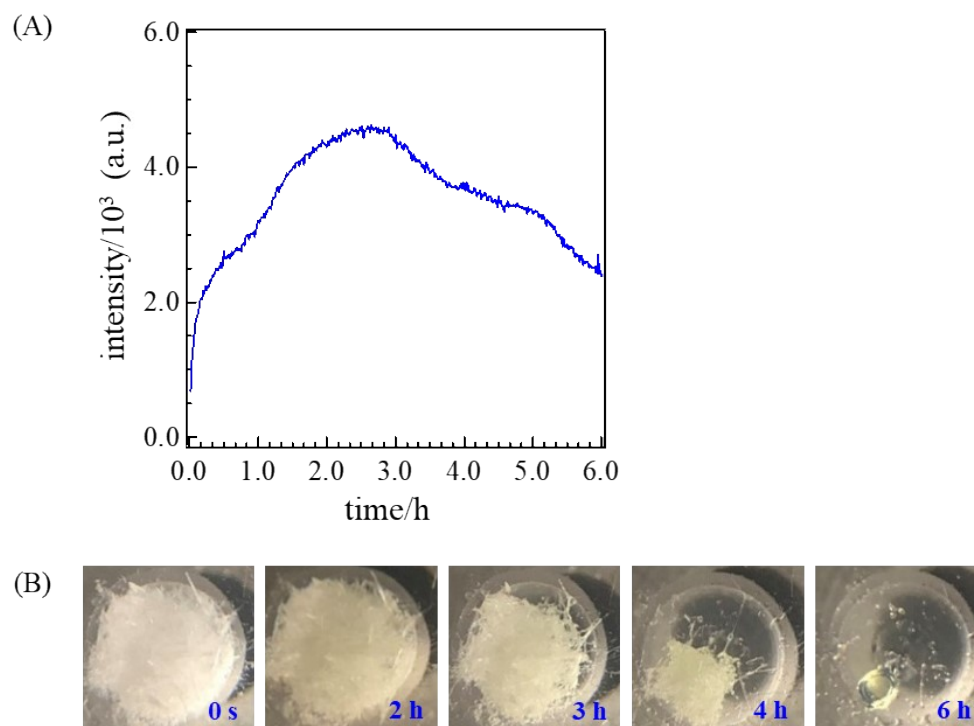

**Fig. S4** (A) Time course changes of CL emission intensities observed for the crystal samples of *cis-syn-1* heated at 130 °C (monitored at 461 nm). (B) Morphological changes of a heated crystal sample of *cis-syn-1*. Times after the starts of heating were shown in the pictures.

## 5. Fluorescence of fluorophore-linked 2-adamantanone 2, *cis-syn-1* and *cis-anti-1*

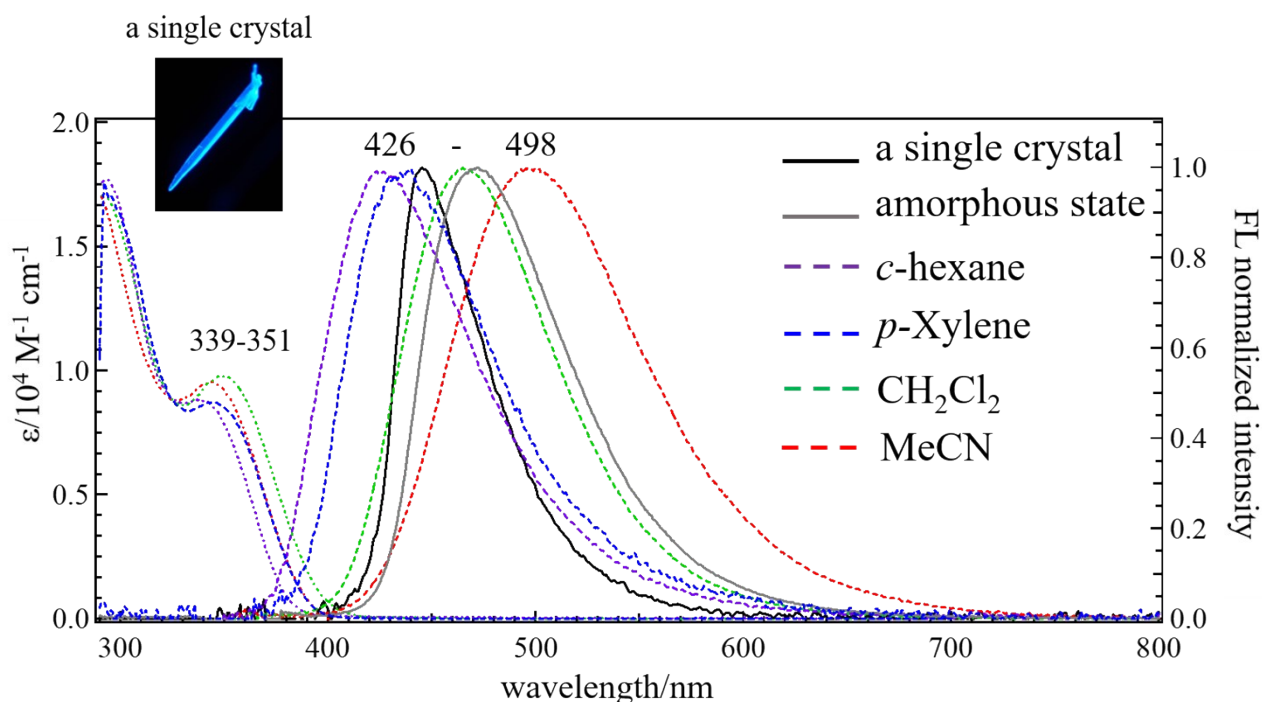

**Fig. S5** Fluorescence spectra of **2** with samples in solutions (cyclohexane, *p*-xylene, CH<sub>2</sub>Cl<sub>2</sub> and acetonitrile) and solid states (crystalline and amorphous states) at 298 K.

**Table S2.** Fluorescence properties of **2** at 298 K.

| solvent ( $E_T(30)^a$ )<br>or solid state | $\lambda_{\text{abs}}/\text{nm}$ ( $\epsilon / 10^3 \text{ M}^{-1} \text{ cm}^{-1}$ ) <sup>b</sup> | $\lambda_f/\text{nm}$ ( $\Phi_f$ ) [ $\lambda_{\text{ex}} / \text{nm}$ ] <sup>c</sup> |
|-------------------------------------------|----------------------------------------------------------------------------------------------------|---------------------------------------------------------------------------------------|
| MeCN (45.6)                               | 344 (9.56)                                                                                         | 498 (0.96) [350]                                                                      |
| CH <sub>2</sub> Cl <sub>2</sub> (40.7)    | 351 (9.79)                                                                                         | 465 (1.0) [350]                                                                       |
| <i>p</i> -xylene (34.3)                   | 344 (8.72)                                                                                         | 436 (0.10) [350]                                                                      |
| <i>c</i> -hexane (30.8)                   | 339 (8.83)                                                                                         | 426 (0.12) [350]                                                                      |
| a single crystal                          | -                                                                                                  | 445 (0.52) [380]                                                                      |
| amorphous state                           | -                                                                                                  | 470 (0.66) [380]                                                                      |

<sup>a</sup> Solvent parameter  $E_T(30)$  in kcal mol<sup>-1</sup>.

<sup>b</sup> Absorption maxima ( $\lambda_{\text{abs}}$ ) and molar absorption coefficient ( $\epsilon$ ) in parenthesis.

<sup>c</sup> Emission maxima ( $\lambda_f$ ), quantum yield ( $\Phi_f$ ) in parenthesis and excitation wavelength ( $\lambda_{\text{ex}}$ ) in square bracket.

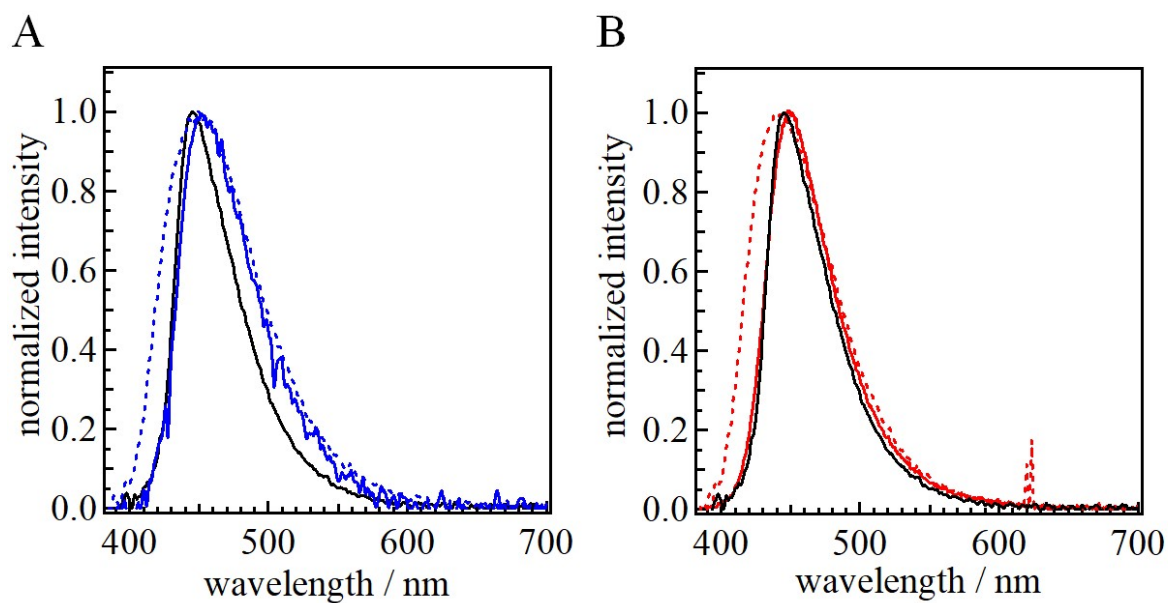

**Fig. S6** Comparison of the emission spectra of the crystalline-state CL of *cis-syn-1* (A, blue solid line) and *cis-anti-1* (B, red solid line) with the crystalline-state fluorescence spectra of **2** (black solid line), *cis-syn-1* (A, blue dashed line) and *cis-anti-1* (B, red dashed line).

**Table S3.** Fluorescence properties of *cis-syn-1* and *cis-anti-1* in the crystalline state at 298 K.

| compound          | $\lambda_f/\text{nm}$ ( $\Phi_f$ ) [ $\lambda_{\text{ex}} = 380 \text{ nm}$ ] <sup>a</sup> |
|-------------------|--------------------------------------------------------------------------------------------|
| <i>cis-syn-1</i>  | 449 (0.38)                                                                                 |
| <i>cis-anti-1</i> | 440 (0.36)                                                                                 |

<sup>a</sup>Emission maximum ( $\lambda_f$ ), quantum yield ( $\Phi_f$ ) in parenthesis and excitation wavelength ( $\lambda_{\text{ex}}$ ) in square bracket.

## 6. Fluorescence lifetime measurements of fluorophore-linked 2-adamantanone 2

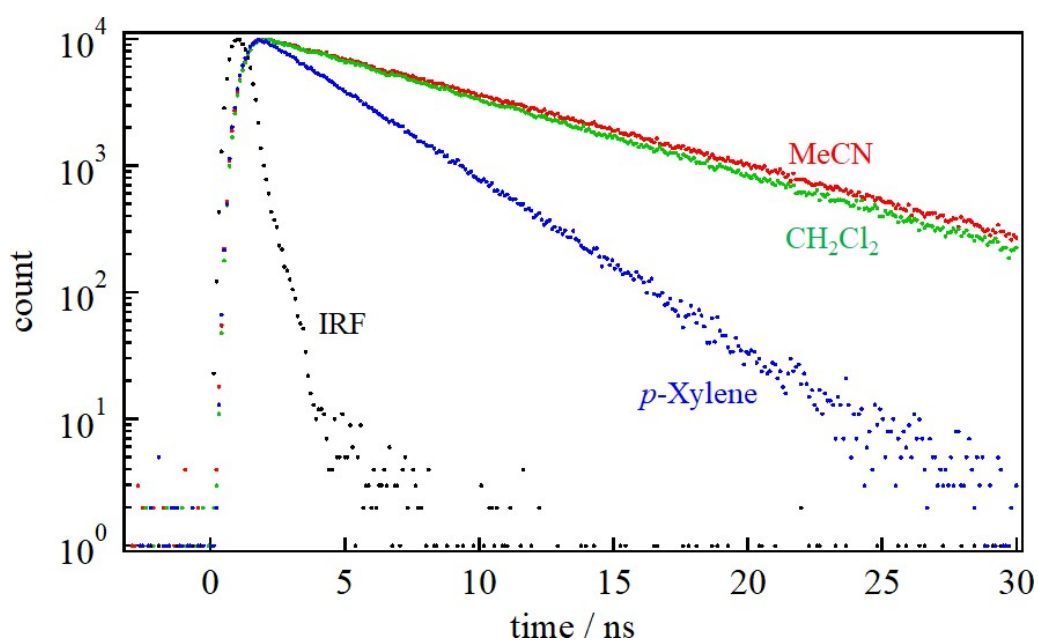

**Fig. S7** Fluorescence lifetime measurements of **2** in *p*-xylene, CH<sub>2</sub>Cl<sub>2</sub> and acetonitrile.

**Table S4.** Fluorescence lifetimes and rate constants of the fluorescence emission process for **2** at 298 K.

| solvent ( $E_T(30)^a$ )                | $\tau_f^b/\text{ns}$ | $k_f^c/10^8 \text{ s}^{-1}$ |
|----------------------------------------|----------------------|-----------------------------|
| MeCN (45.6)                            | 7.67                 | 1.28                        |
| CH <sub>2</sub> Cl <sub>2</sub> (40.7) | 7.14                 | 1.40                        |
| <i>p</i> -xylene (34.3)                | 3.08                 | 0.33                        |

<sup>a</sup> Solvent parameter  $E_T(30)$  in kcal mol<sup>-1</sup>.

<sup>b</sup> Fluorescence lifetime.

<sup>c</sup> Rate constant of the fluorescence emission process determined by  $k_f = \Phi_f \tau_f^{-1}$ .

## 7. X-ray crystallographic analyses of *cis-syn-1* and **2**

**Table S5.** Crystal data and structure refinement for *cis-syn-1* and **2**.

|                                                                 | <i>cis-syn-1</i>                                                              | <b>2</b>                                                        |
|-----------------------------------------------------------------|-------------------------------------------------------------------------------|-----------------------------------------------------------------|
| CCDC deposit code                                               | 2132563                                                                       | 2128839                                                         |
| Formula                                                         | C <sub>68</sub> H <sub>56</sub> F <sub>6</sub> N <sub>2</sub> O <sub>12</sub> | C <sub>34</sub> H <sub>28</sub> F <sub>3</sub> N O <sub>6</sub> |
| Formula weight                                                  | 1207.14                                                                       | 603.57                                                          |
| <i>T</i> / K                                                    | 95(2)                                                                         | 100                                                             |
| Wavelength / Å                                                  | 0.750                                                                         | 0.71075                                                         |
| Crystal system                                                  | monoclinic                                                                    | monoclinic                                                      |
| Space group                                                     | <i>P</i> 2 <sub>1</sub> / <i>c</i>                                            | <i>P</i> $\bar{1}$                                              |
| <i>a</i> / Å                                                    | 28.409(15)                                                                    | 7.4930(4)                                                       |
| <i>b</i> / Å                                                    | 17.899(6)                                                                     | 13.8284(10)                                                     |
| <i>c</i> / Å                                                    | 12.633(5)                                                                     | 15.4815(13)                                                     |
| $\alpha$ / °                                                    | 90                                                                            | 108.781(7)                                                      |
| $\beta$ / °                                                     | 101.158(18)                                                                   | 101.858(6)                                                      |
| $\gamma$ / °                                                    | 90                                                                            | 105.672(6)                                                      |
| <i>V</i> / Å <sup>3</sup>                                       | 6302(5)                                                                       | 1384.96(19)                                                     |
| <i>Z</i>                                                        | 4                                                                             | 2                                                               |
| <i>D</i> <sub>calc</sub> / g cm <sup>-3</sup>                   | 1.272                                                                         | 1.447                                                           |
| $\mu$ / mm <sup>-1</sup>                                        | 0.099                                                                         | 0.112                                                           |
| <i>F</i> (000)                                                  | 2512                                                                          | 628.0                                                           |
| Reflections collected                                           | 43430                                                                         | 25797                                                           |
| Independent reflections                                         | 6588                                                                          | 6970                                                            |
| Refined parameters                                              | 796                                                                           | 426                                                             |
| GOF on <i>F</i> <sup>2</sup>                                    | 1.025                                                                         | 1.054                                                           |
| <i>R</i> <sub>1</sub> [ <i>I</i> > 2σ( <i>I</i> )] <sup>a</sup> | 0.0747                                                                        | 0.0645                                                          |
| <i>wR</i> <sub>2</sub> (all data) <sup>b</sup>                  | 0.2230                                                                        | 0.1732                                                          |
| Δρ <sub>min, max</sub> / e Å <sup>-3</sup>                      | -0.254, 0.392                                                                 | -0.285, 0.515                                                   |

<sup>a</sup>  $R_1 = \Sigma||F_0| - |F_c||/\Sigma|F_0|$ . <sup>b</sup>  $wR_2 = [\Sigma w(F_0^2 - F_c^2)^2/\Sigma w(F_0^2)^2]^{1/2}$ .



## 8. DFT calculations of a fluorophore moiety

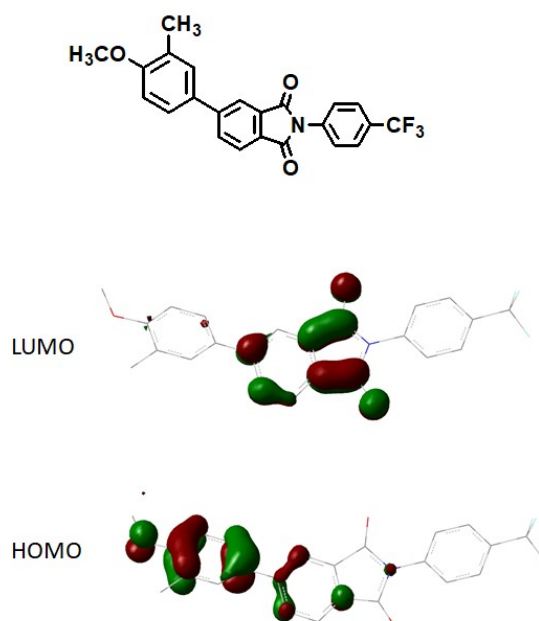

**Fig. S8** Frontier orbitals of the fluorophore moiety (B3LYP/6-31G(d)).

**Table S6.** DFT and TD-DFT calculation data for the  $S_0 \rightarrow S_1$  transition of the fluorophore moiety (B3LYP/6-31G(d)).

|                                                                  |                                                                       |
|------------------------------------------------------------------|-----------------------------------------------------------------------|
| HOMO level                                                       | -6.02 eV                                                              |
| LUMO level                                                       | -2.38 eV                                                              |
| excitation energy ( $E_{ex}$ )                                   | 3.182 eV                                                              |
| wavelength calculated from the $E_{ex}$ value ( $\lambda_{ex}$ ) | 389.6 nm                                                              |
| oscillator strength ( $f$ )                                      | 0.1787                                                                |
| configuration                                                    | HOMO $\rightarrow$ LUMO (0.686)<br>HOMO-1 $\rightarrow$ LUMO (-0.144) |

**Table S7.** Cartesian coordinate (in Å) of the fluorophore moiety  
(B3LYP/6-31G(d)).

| No | atom | x          | y           | z          |
|----|------|------------|-------------|------------|
| 1  | C    | -4.3579374 | -5.4839233  | 0.2898403  |
| 2  | C    | -2.9722352 | -5.5013462  | 0.1426760  |
| 3  | C    | -2.2532606 | -4.3179714  | 0.0391725  |
| 4  | C    | -2.9670748 | -3.1180324  | 0.0934390  |
| 5  | C    | -4.3722492 | -3.0809527  | 0.2394591  |
| 6  | C    | -5.0758554 | -4.3014710  | 0.3373962  |
| 7  | C    | -4.8455561 | -6.8885798  | 0.3594440  |
| 8  | C    | -2.5106419 | -6.9109611  | 0.1230606  |
| 9  | H    | -1.1729815 | -4.3281789  | -0.0677700 |
| 10 | H    | -2.4233348 | -2.1795172  | 0.0468613  |
| 11 | H    | -6.1575666 | -4.3194759  | 0.4216287  |
| 12 | O    | -5.9867557 | -7.2819164  | 0.4806881  |
| 13 | O    | -1.3785556 | -7.3336217  | 0.0154806  |
| 14 | C    | -3.6994975 | -9.1287715  | 0.2841255  |
| 15 | C    | -2.6635963 | -9.8279813  | 0.9188068  |
| 16 | C    | -4.7462425 | -9.8329700  | -0.3270915 |
| 17 | C    | -2.6771630 | -11.2195700 | 0.9360695  |
| 18 | H    | -1.8472631 | -9.2874447  | 1.3789313  |
| 19 | C    | -4.7571955 | -11.2241379 | -0.2927836 |
| 20 | H    | -5.5488671 | -9.2957770  | -0.8145505 |
| 21 | C    | -3.7232668 | -11.9231613 | 0.3346906  |
| 22 | H    | -1.8686211 | -11.7586661 | 1.4182661  |
| 23 | H    | -5.5665952 | -11.7669394 | -0.7694034 |
| 24 | N    | -3.6869297 | -7.7061461  | 0.2570900  |
| 25 | C    | -3.7666514 | -13.4239060 | 0.4128264  |
| 26 | F    | -4.3990999 | -13.9662770 | -0.6520489 |
| 27 | F    | -2.5277896 | -13.9622325 | 0.4676844  |
| 28 | F    | -4.4263866 | -13.8497760 | 1.5163984  |
| 29 | C    | -5.0944239 | -1.7886713  | 0.2897985  |
| 30 | C    | -4.6717295 | -0.6862257  | -0.4790515 |
| 31 | C    | -6.2219706 | -1.6204172  | 1.1033441  |
| 32 | C    | -5.3277796 | 0.5399813   | -0.4556016 |
| 33 | H    | -3.8184254 | -0.7978227  | -1.1432095 |
| 34 | C    | -6.9002767 | -0.4025755  | 1.1540319  |
| 35 | H    | -6.5639767 | -2.4372898  | 1.7322598  |

|    |   |            |            |            |
|----|---|------------|------------|------------|
| 36 | C | -6.4592076 | 0.6751685  | 0.3797827  |
| 37 | H | -7.7615027 | -0.3034097 | 1.8045675  |
| 38 | O | -7.0548888 | 1.9013153  | 0.3588696  |
| 39 | C | -8.2064226 | 2.1116462  | 1.1620958  |
| 40 | H | -8.5114564 | 3.1439763  | 0.9822988  |
| 41 | H | -9.0236522 | 1.4361787  | 0.8778177  |
| 42 | H | -7.9824412 | 1.9797175  | 2.2286183  |
| 43 | C | -4.8714915 | 1.7044879  | -1.2974613 |
| 44 | H | -5.6622595 | 2.0359194  | -1.9807631 |
| 45 | H | -4.6161492 | 2.5697319  | -0.6742368 |
| 46 | H | -3.9927064 | 1.4360763  | -1.8914131 |

---

## 9. TG-DTA data of *cis-syn-1*

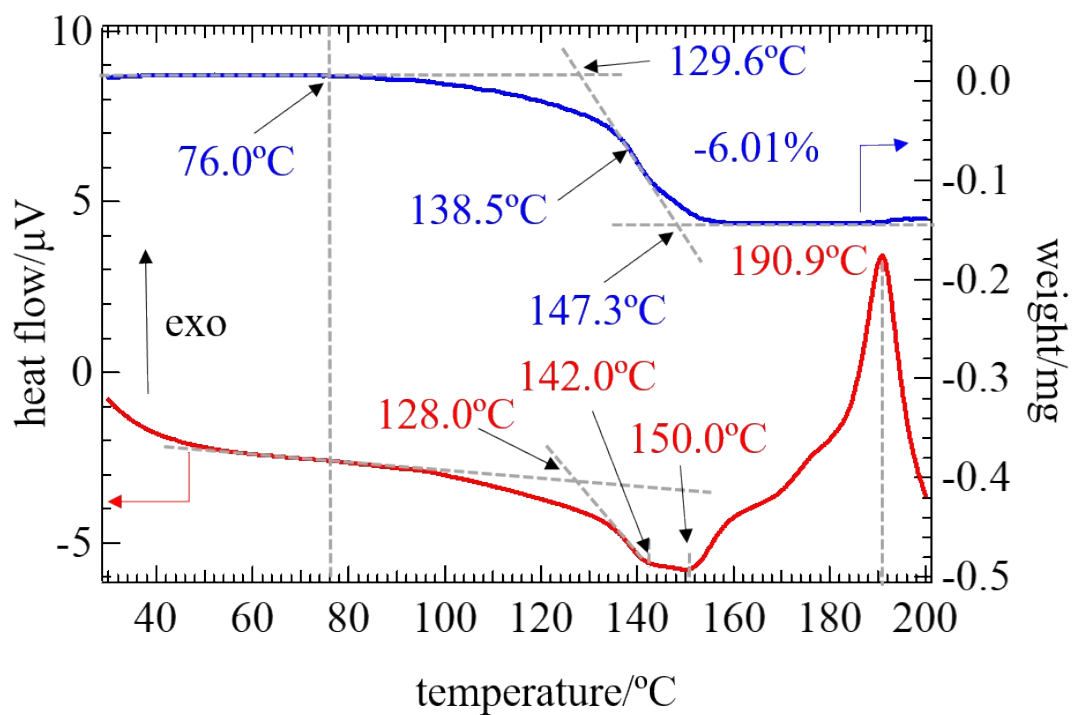

**Fig. S9** TG-DTA diagram of *cis-syn-1* heated at elevated temperature from 30 to 200°C at 10 °C min<sup>-1</sup> rate in an opened alumina pan under N<sub>2</sub> gas flow (300 mL min<sup>-1</sup>). The sample weight was 2.49 mg.

## 10. Observation of a movement of a heated single crystal of *cis-syn-1*

A Pyrex glass plate with a hole ( $\varnothing$  4 mm, thickness 2 mm,  $10 \times 10$  mm) at the center was superimposed on a Pyrex glass plate (thickness 2 mm,  $10 \times 10$  mm). Then, single crystals of *cis-syn-1* were taken in the center hole and covered with another Pyrex glass plate (thickness 2 mm,  $10 \times 10$  mm). The set of the sample glass plates was placed on the heating stage of an optical microscope. Magnified images of the crystals heated from 30 °C to 130 °C were obtained with a digital camera of the optical microscope, to show the morphological changes of the crystals (Figure S10). By replacing the digital camera to a sCMOS camera, magnified images of the heated crystals to show CL emissions were obtained (Figure S11). The digital camera images of the heated single crystals showed their deformations in the range of 90-100 °C. The sCMOS camera images of the heated single crystals indicate that CL in the crystals was observed over 90 °C with showing deformations around at 100 °C.

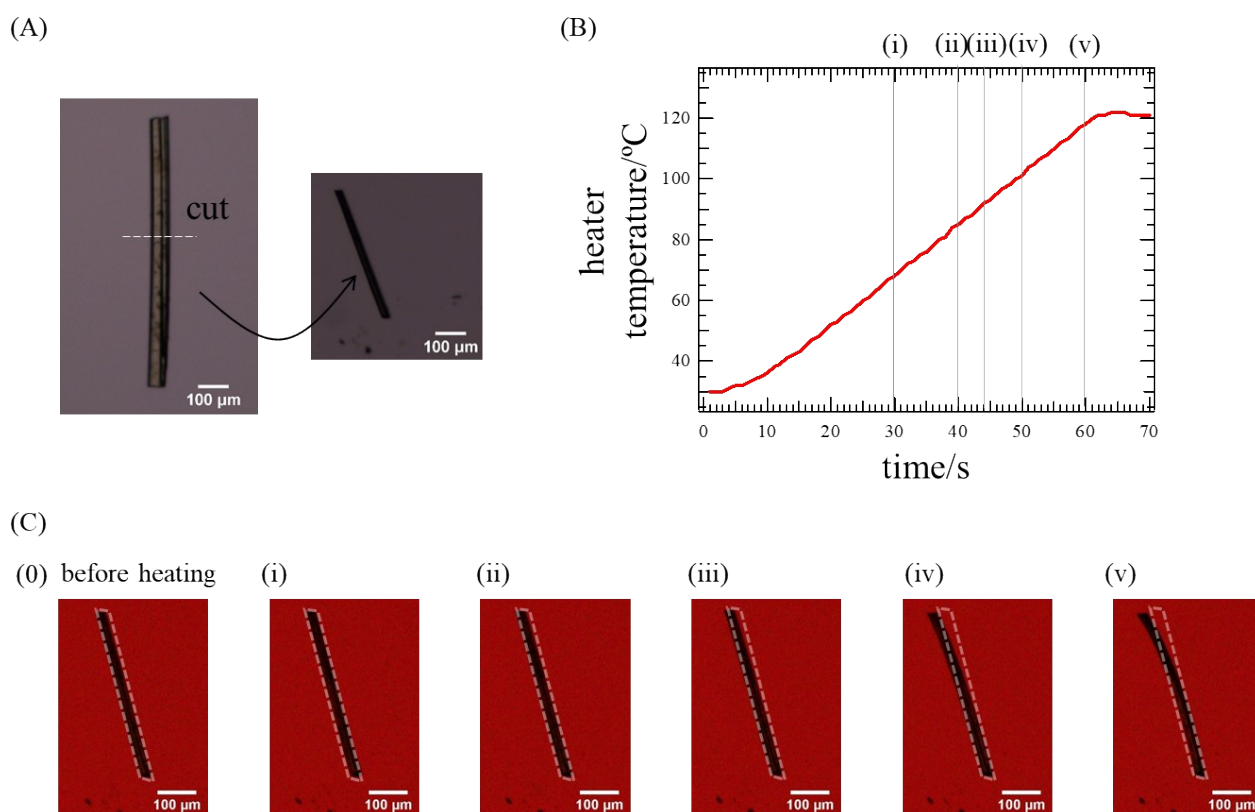

**Fig. S10** (A) Photographs of a single crystal of *cis-syn-1* before and after heating. The size of the crystal was adjusted by cutting to  $28.3 \times 57.9 \times 441.3$  μm. (B) A heating condition at elevated temperature at 100 °C/min. (C) Photographs to show morphological changes of the single crystal under heating. Because *cis-syn-1* is light-sensitive, an optical filter was used to cut off transmitted light in the short wavelength region below 560 nm.

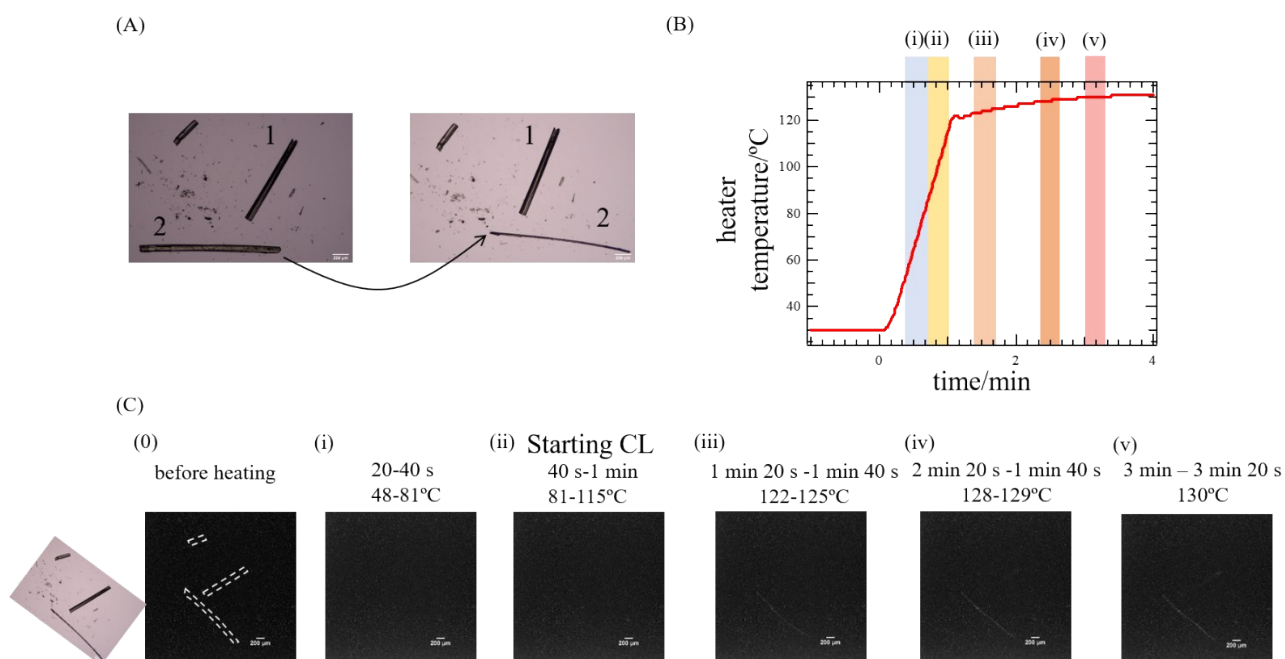

**Fig. S11** (A) Photographs of single crystals of *cis-syn-1*. The sizes of crystals were  $20.0 \times 87.6 \times 1114.1 \mu\text{m}$  for crystal 1 and  $26.4 \times 86.8 \times 1699.8 \mu\text{m}$  for crystal 2. (B) A heating condition of the single crystals. (C) sCMOS camera images of the crystals including crystal 1 (thickness  $20.0 \mu\text{m}$ ) and crystal 2 (thickness  $86.8 \mu\text{m}$ ) under heating.

## 11. $^1\text{H}$ - and $^{13}\text{C}$ -NMR spectra

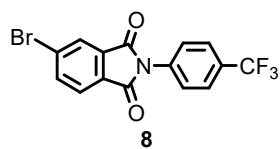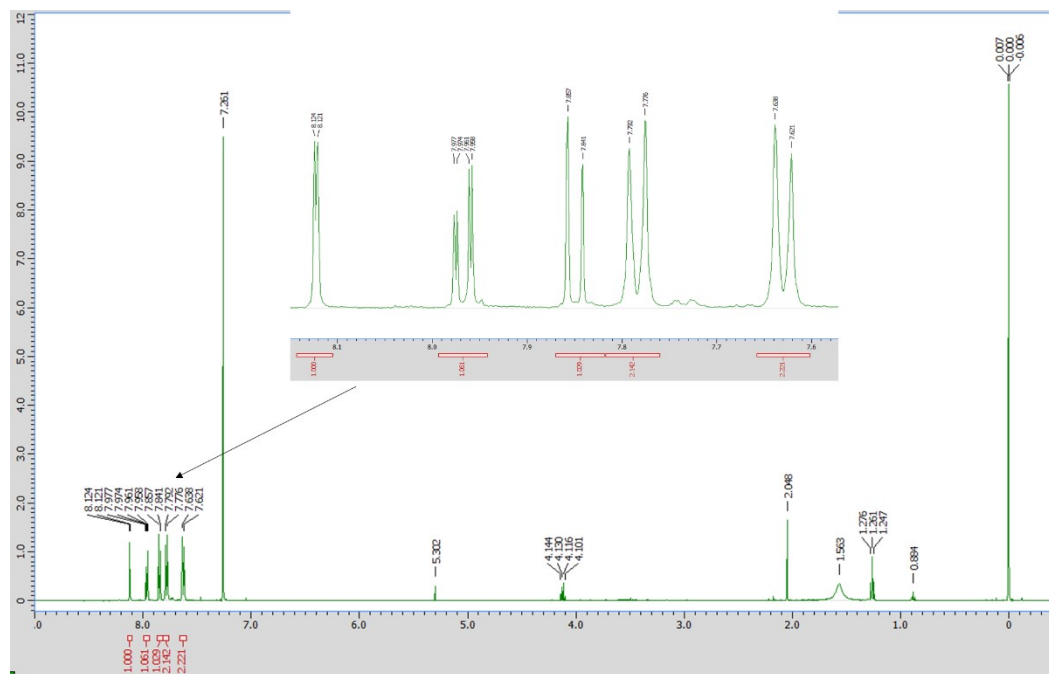

**Fig. S12**  $^1\text{H}$  NMR spectrum of 5-bromo-2-[4-(trifluoromethyl)phenyl]isoindoline-1,3-dione (**8**) in  $\text{CDCl}_3$ .

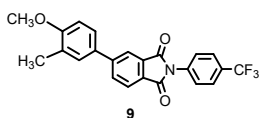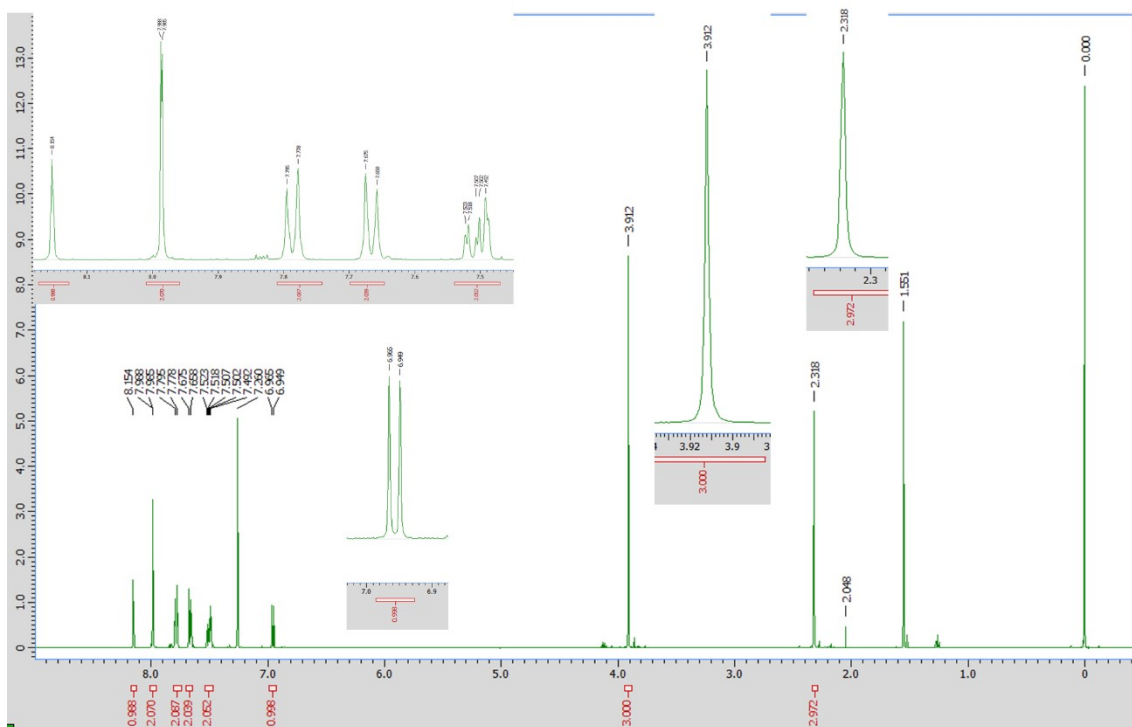

**Fig. S13**  $^1\text{H}$  NMR spectrum of 5-(3-methyl-4-methoxyphenyl)-2-[4-(trifluoromethyl)phenyl]isoindoline-1,3-dione (**9**) in  $\text{CDCl}_3$ .

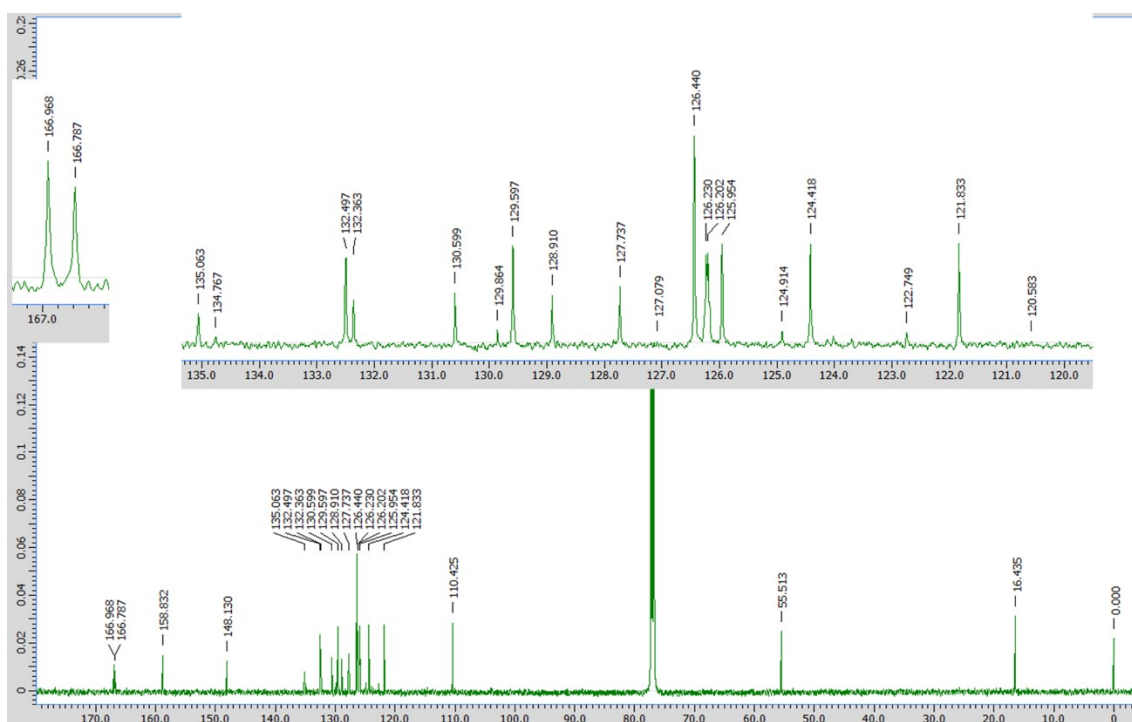

**Fig. S14**  $^{13}\text{C}$  NMR spectrum of 5-(3-methyl-4-methoxyphenyl)-2-[4-(trifluoromethyl)phenyl]isoindoline-1,3-dione (**9**) in  $\text{CDCl}_3$ .



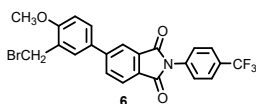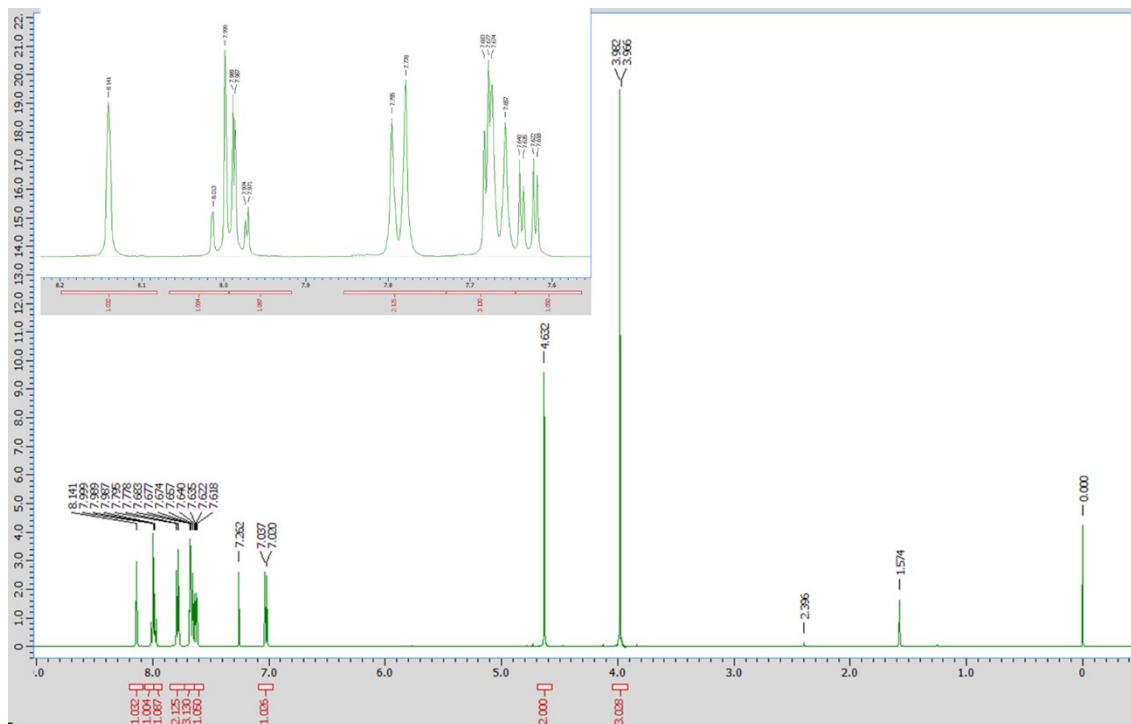

**Fig. S15** <sup>1</sup>H NMR spectrum of 5-(3-bromomethyl-4-methoxyphenyl)-2-[4-(trifluoromethyl)phenyl]isoindoline-1,3-dione (**6**) in CDCl<sub>3</sub>.

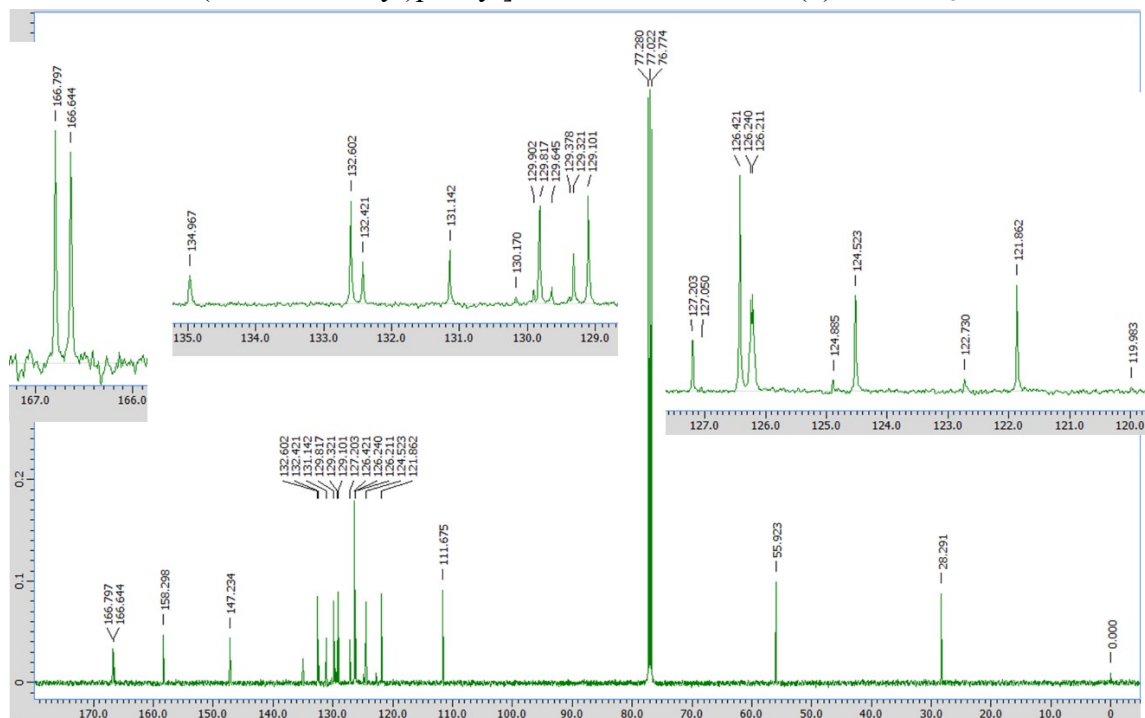

**Fig. S16** <sup>13</sup>C NMR spectrum of 5-(3-bromomethyl-4-methoxyphenyl)-2-[4-(trifluoromethyl)phenyl]isoindoline-1,3-dione (**6**) in CDCl<sub>3</sub>.

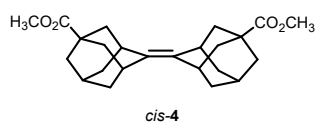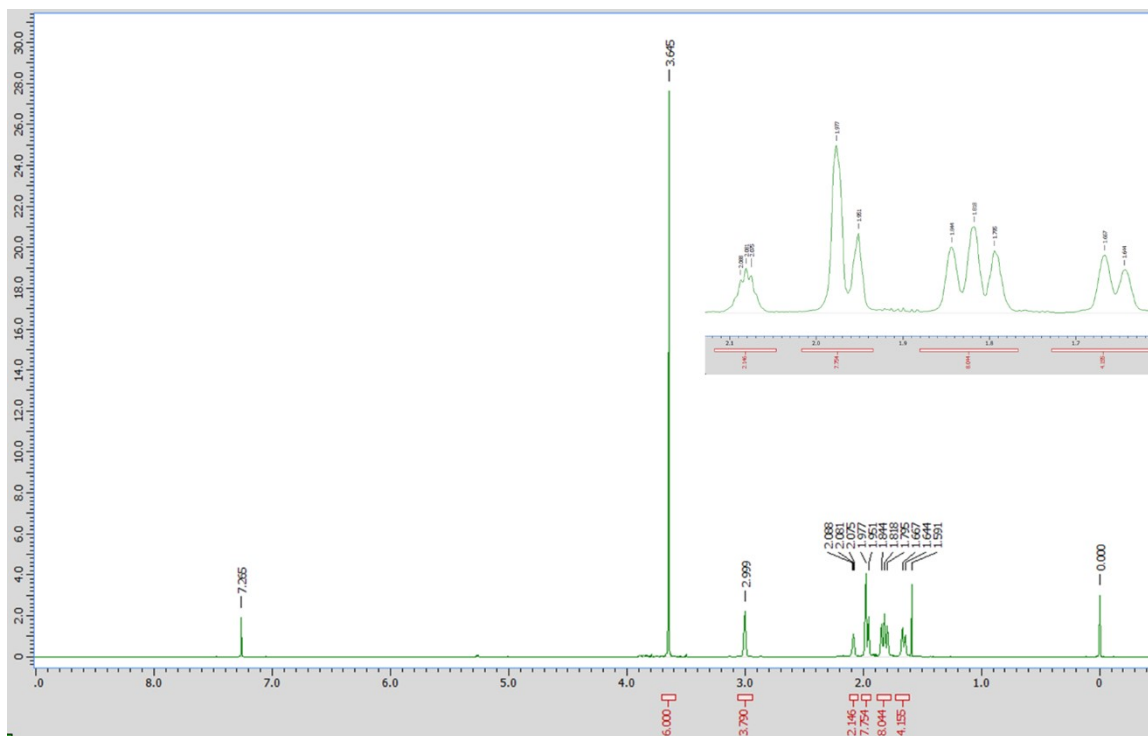

**Fig. S17**  $^1\text{H}$  NMR spectrum of *cis*-5,5'-dicarbomethoxyadamantylideneadamantane (*cis-4*) in  $\text{CDCl}_3$ .

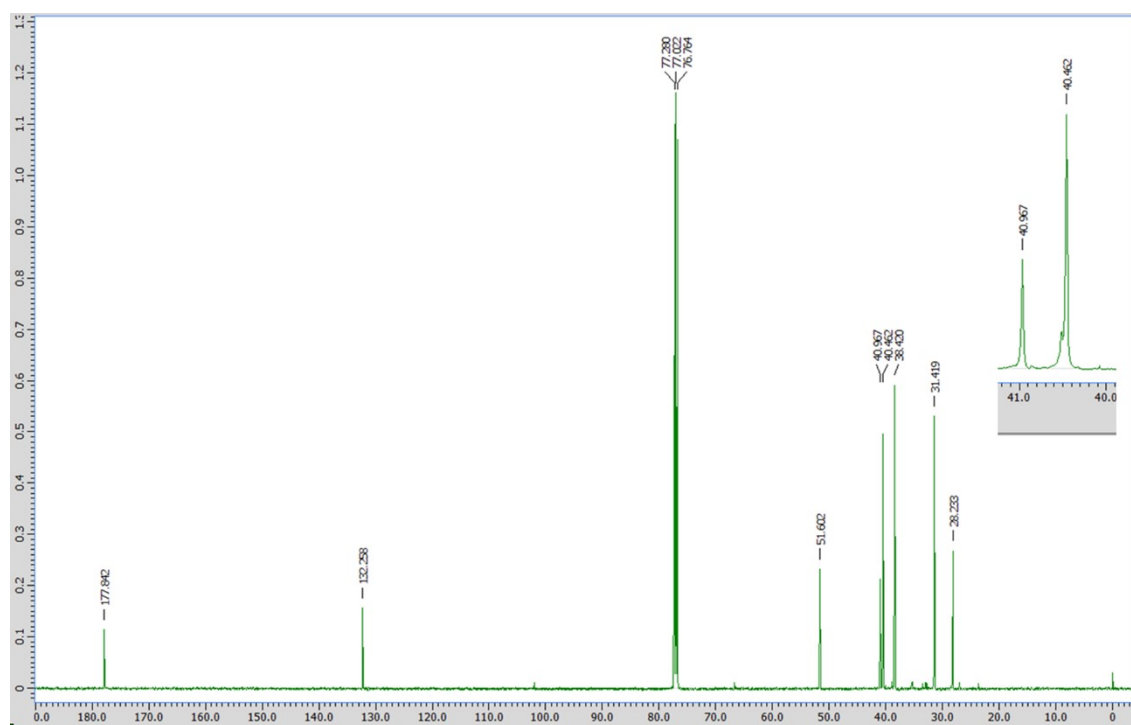

**Fig. S18**  $^{13}\text{C}$  NMR spectrum of *cis*-5,5'-dicarbomethoxyadamantylideneadamantane (*cis-4*) in  $\text{CDCl}_3$ .

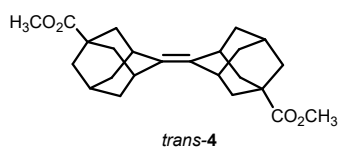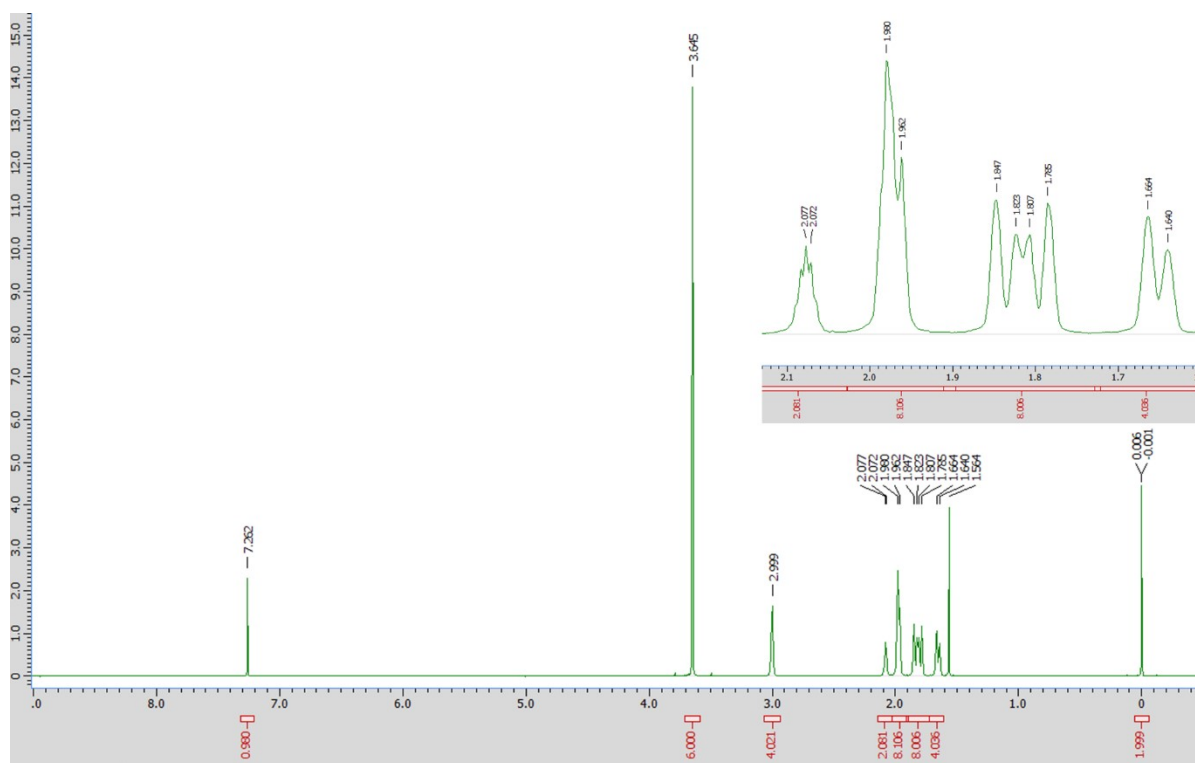

**Fig. S19** <sup>1</sup>H NMR spectrum of *trans*-5,5'-dicarbomethoxyadamantylideneadamantane (*trans*-4) in CDCl<sub>3</sub>.

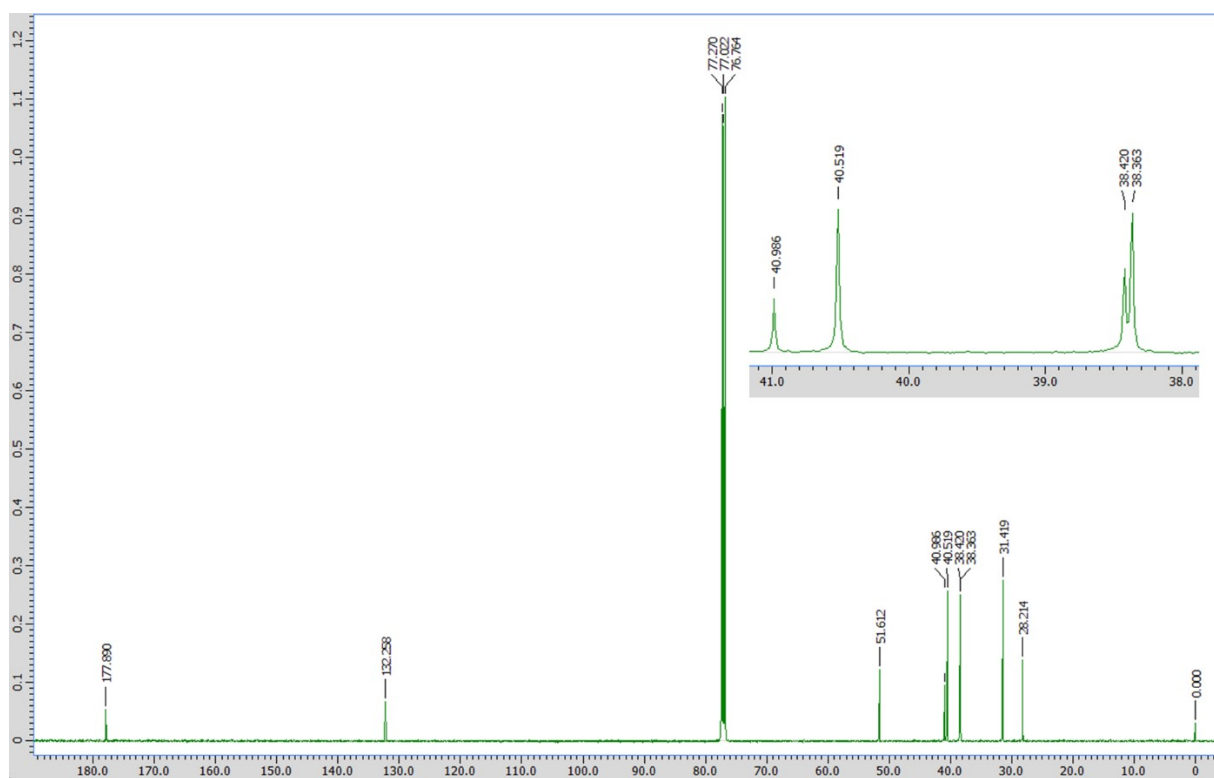

**Fig. S20** <sup>13</sup>C NMR spectrum of *trans*-5,5'-dicarbomethoxyadamantylideneadamantane (*trans*-4) in CDCl<sub>3</sub>.





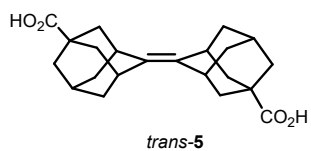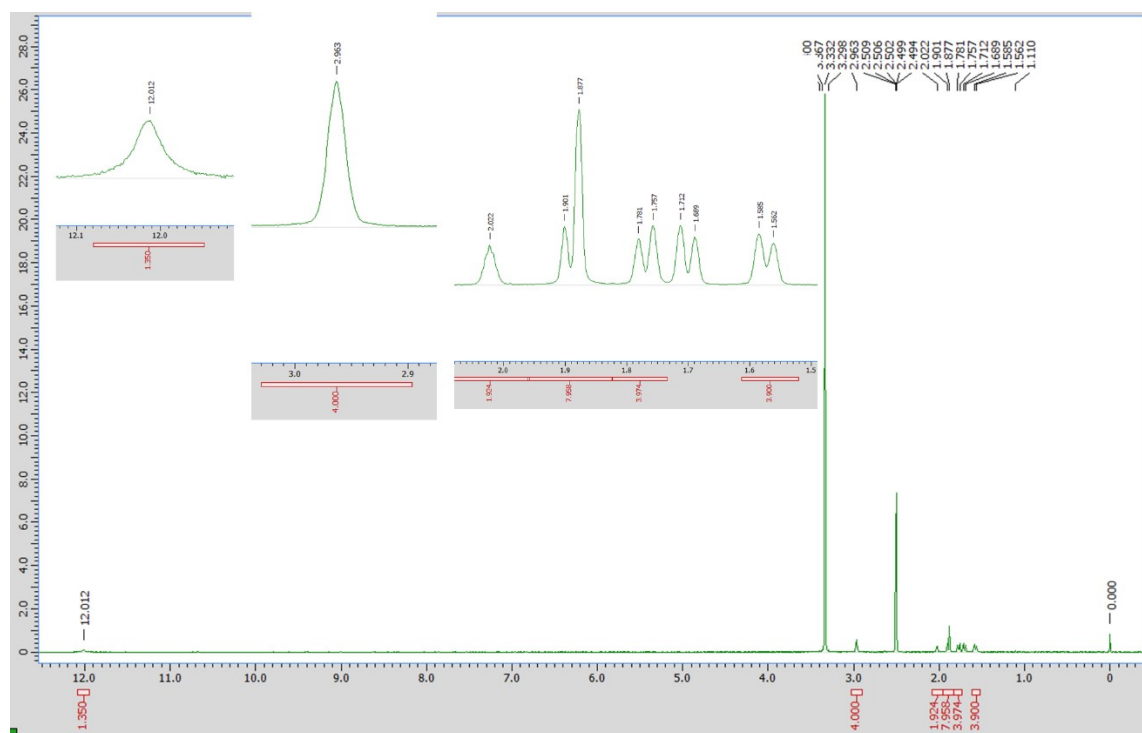

**Fig. S23**  $^1\text{H}$  NMR spectrum of *trans*-5,5'-dicarboxyadamantylideneadamantane (*trans*-5) in  $\text{DMSO-}d_6$ .

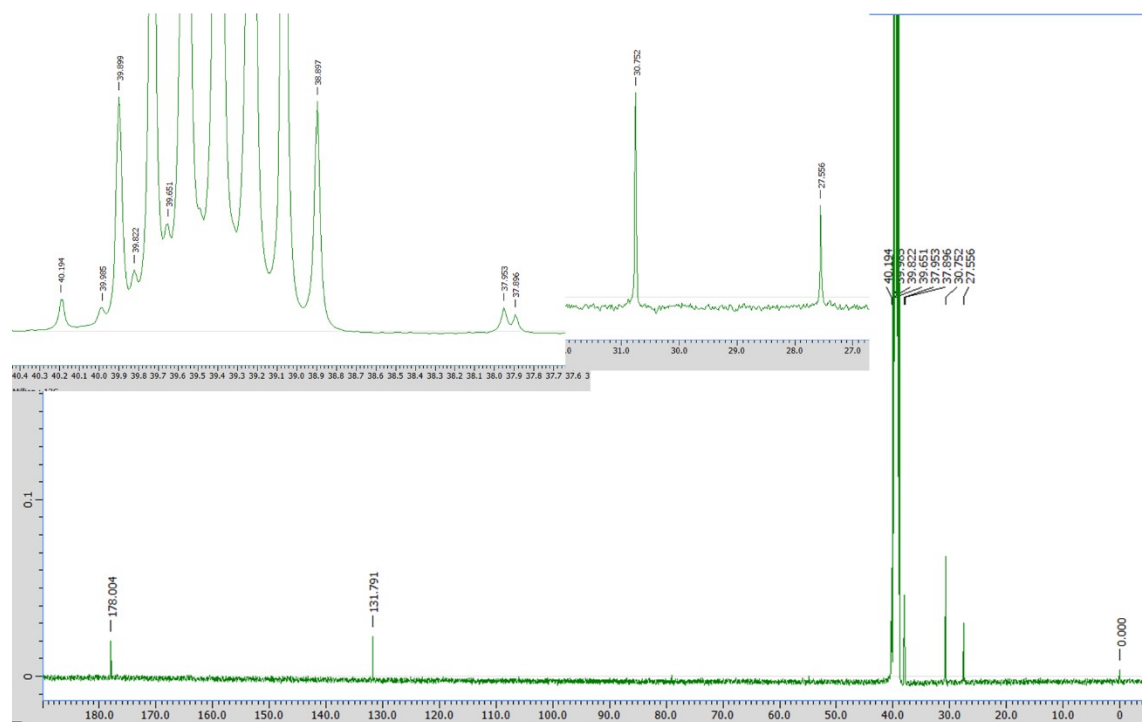

**Fig. S24**  $^{13}\text{C}$  NMR spectrum of *trans*-5,5'-dicarboxyadamantylideneadamantane (*trans*-5) in  $\text{DMSO-}d_6$ .

DMSO-*d*<sub>6</sub>.

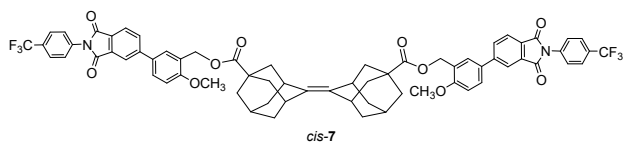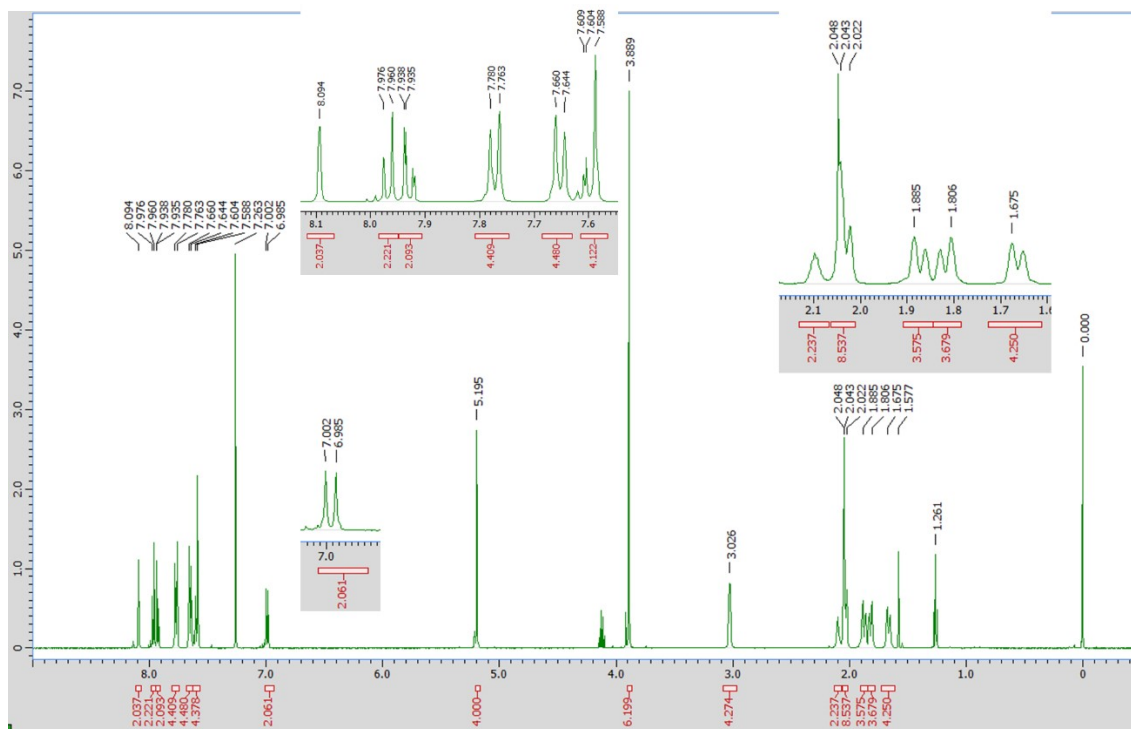

**Fig. S25** <sup>1</sup>H NMR spectrum of *cis*-5,5'-di{1-methoxy-4-[4-(trifluoromethyl)phenyl]isoindoline-1,3-dionylbenzyloxycarbonyl}adamantylideneadamantane (*cis*-7) in CDCl<sub>3</sub>.

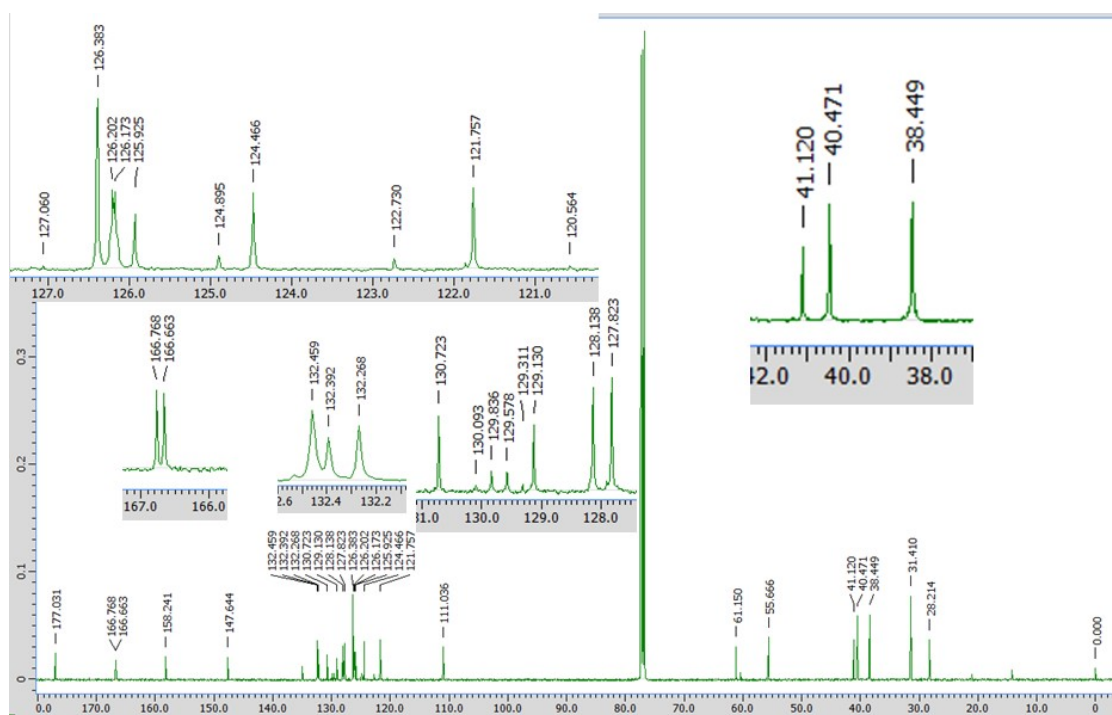

**Fig. S26** <sup>13</sup>C NMR spectrum of *cis*-5,5'-di{1-methoxy-4-[4-(trifluoromethyl)phenyl]isoindoline-





1,3-dionylbenzyloxycarbonyl}adamantylideneadamantane (*trans-7*) in CDCl<sub>3</sub>.

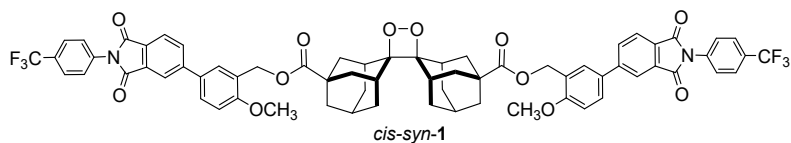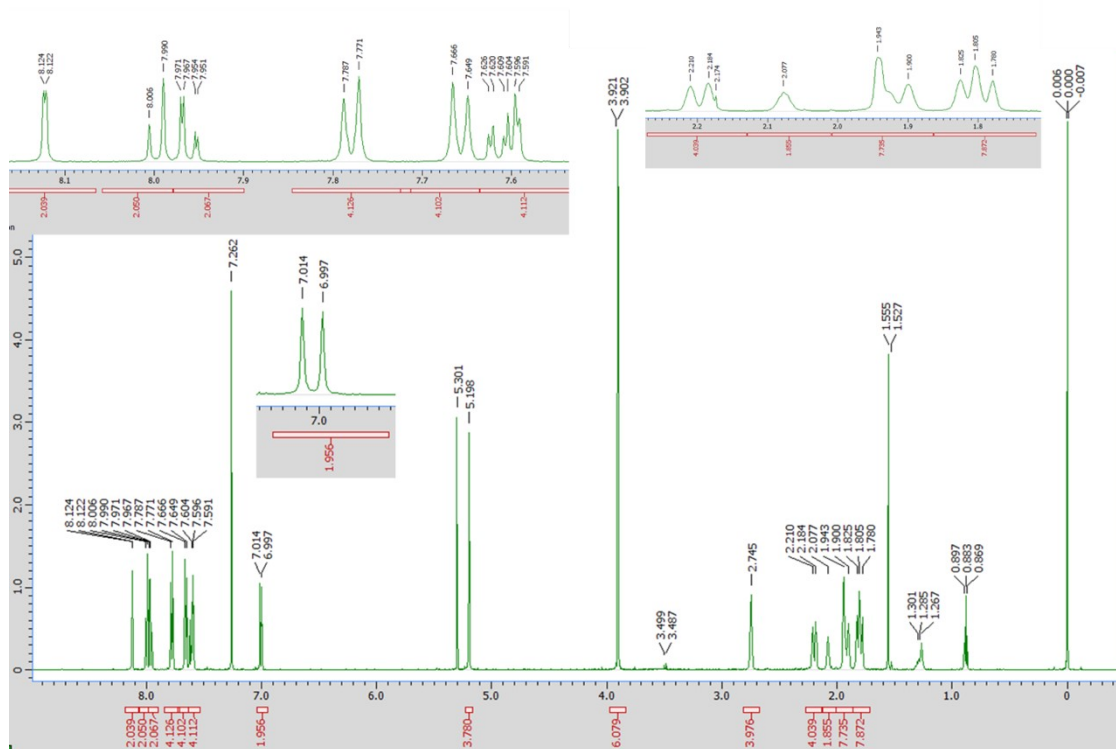

**Fig. S29** <sup>1</sup>H NMR spectrum of *cis-syn-5,5'*-di{1-methoxy-4-[4-(trifluoromethyl)phenyl]isoindoline-1,3-dionylbenzyloxycarbonyl}adamantylideneadamantane 1,2-dioxetane (*cis-syn-1*) in CDCl<sub>3</sub>.

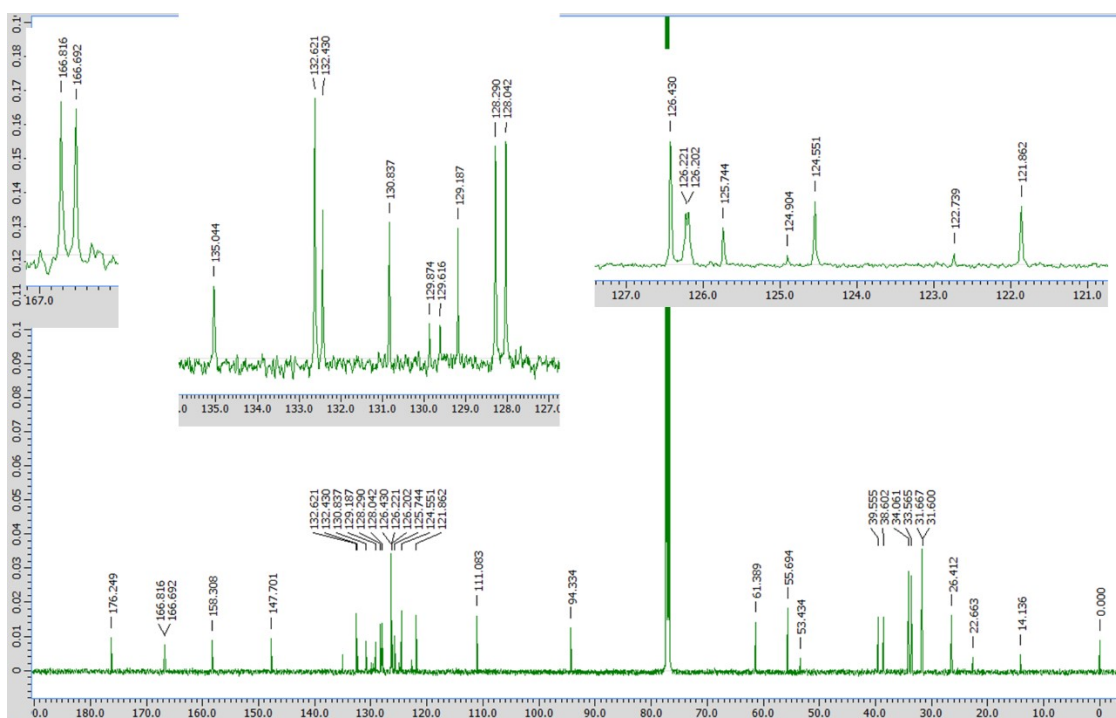

**Fig. S30**  $^{13}\text{C}$  NMR spectrum of *cis-syn*-5,5'-di{1-methoxy-4-[4-(trifluoromethyl)phenyl]isoindoline-1,3-dionylbenzyloxycarbonyl}adamantylideneadamantane 1,2-dioxetane (*cis-syn*-1) in  $\text{CDCl}_3$ .

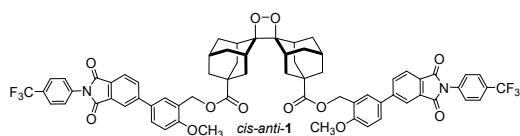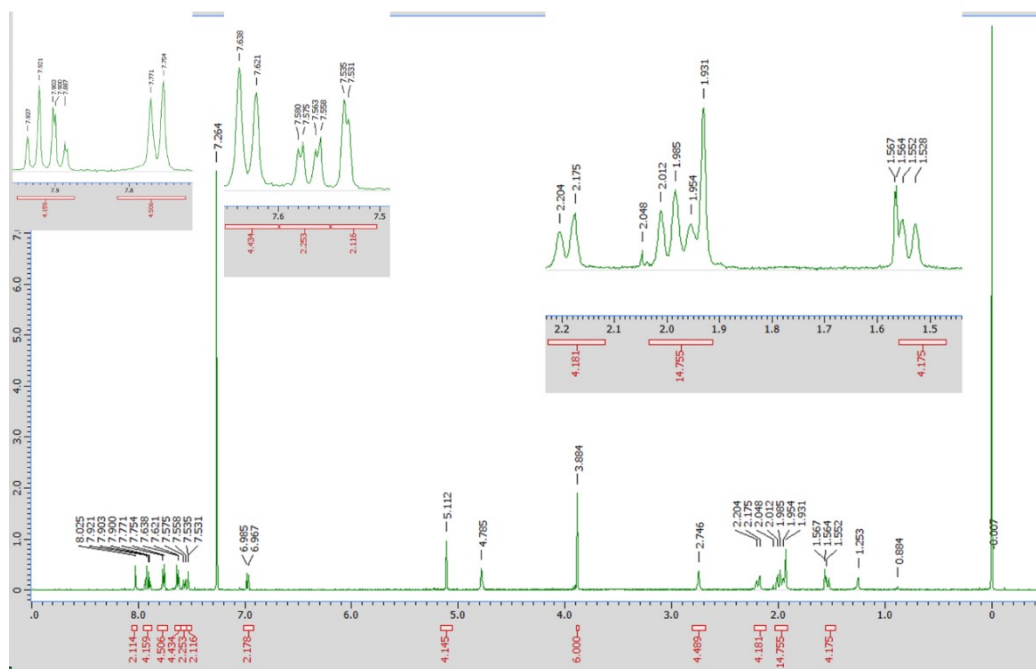

**Fig. S31**  $^1\text{H}$  NMR spectrum of *cis-anti*-5,5'-di{1-methoxy-4-[4-(trifluoromethyl)phenyl]isoindoline-1,3-dionylbenzyloxycarbonyl}adamantylideneadamantane 1,2-dioxetane (*cis-anti*-1) in  $\text{CDCl}_3$  containing  $\text{D}_2\text{O}$ .

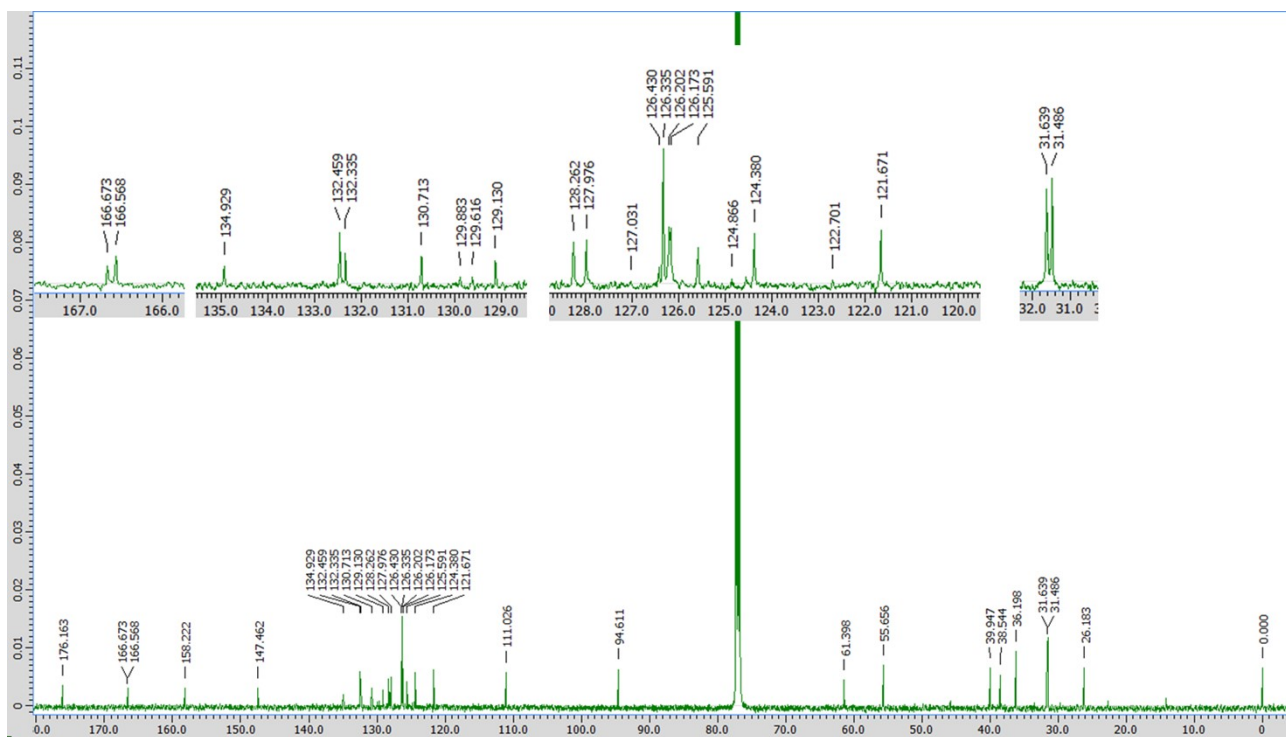

**Fig. S32**  $^{13}\text{C}$  NMR spectrum of *cis-anti*-5,5'-di{1-methoxy-4-[4-(trifluoromethyl)phenylisoindoline-1,3-dionyl]benzyl}calboxyadamantylideneadamantane 1,2-dioxetane (*cis-anti-1*) in  $\text{CDCl}_3$ .

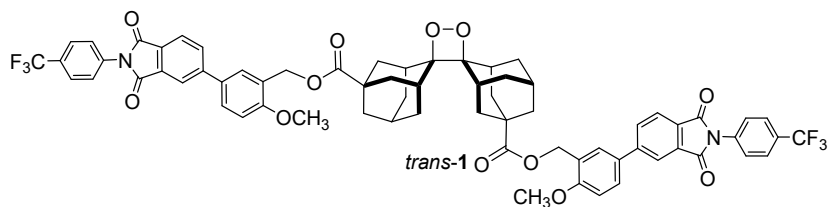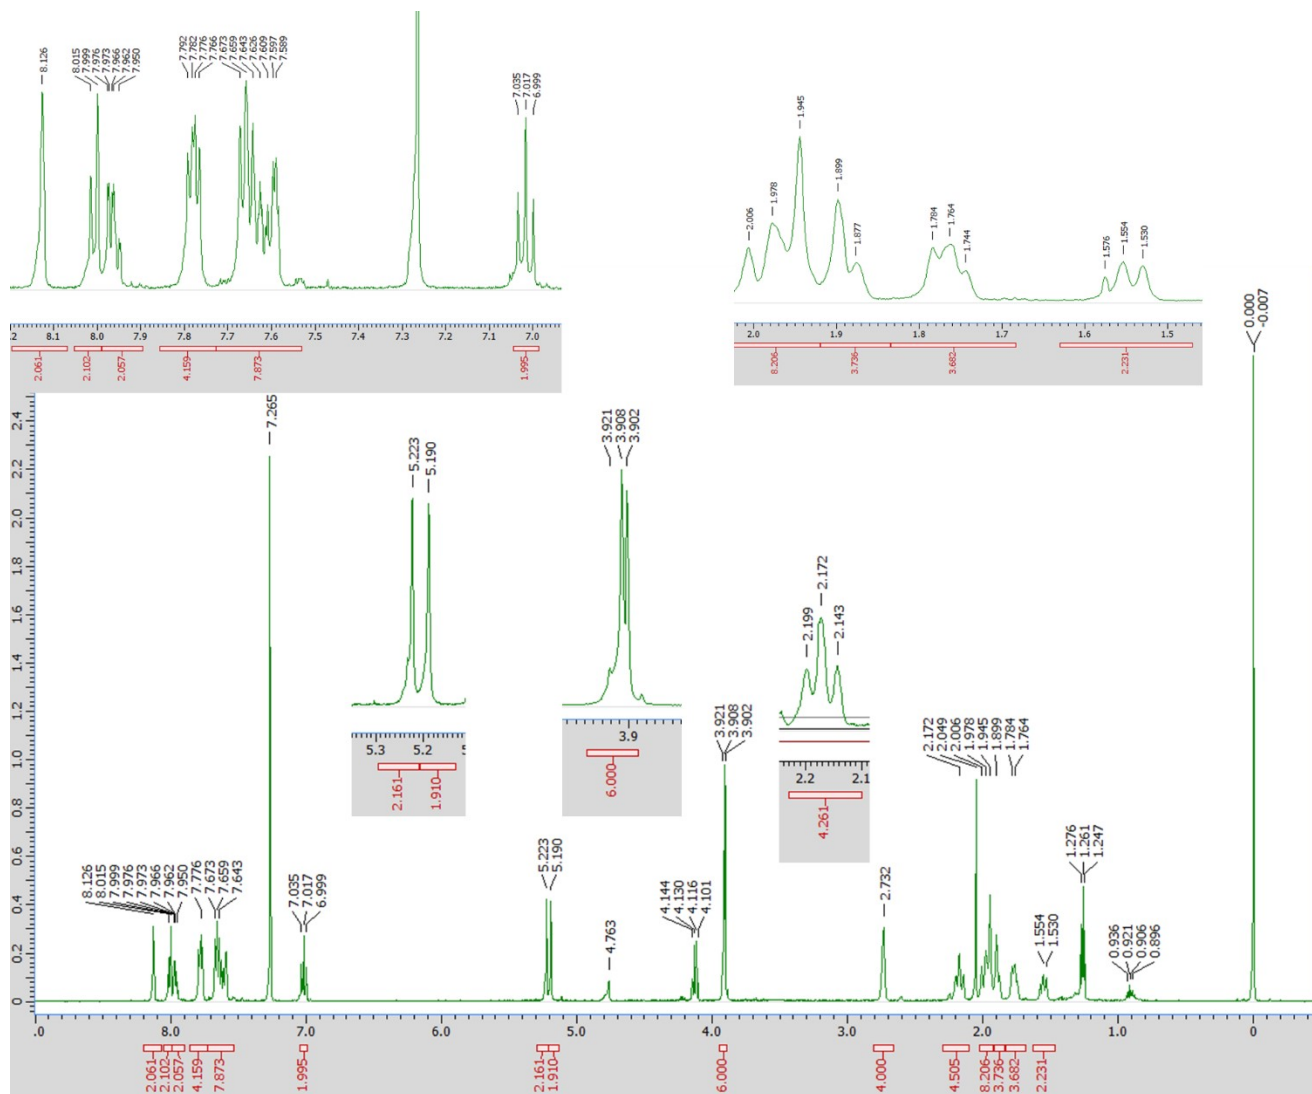

**Fig. S33**  $^1\text{H}$  NMR spectrum of *trans-5,5'*-di{1-methoxy-4-[4-(trifluoromethyl)phenyl]isoindoline-1,3-dionylbenzyloxycarbonyl}adamantylideneadamantane 1,2-dioxetane (*trans-1*) in  $\text{CDCl}_3$  containing  $\text{D}_2\text{O}$ .

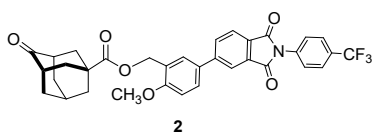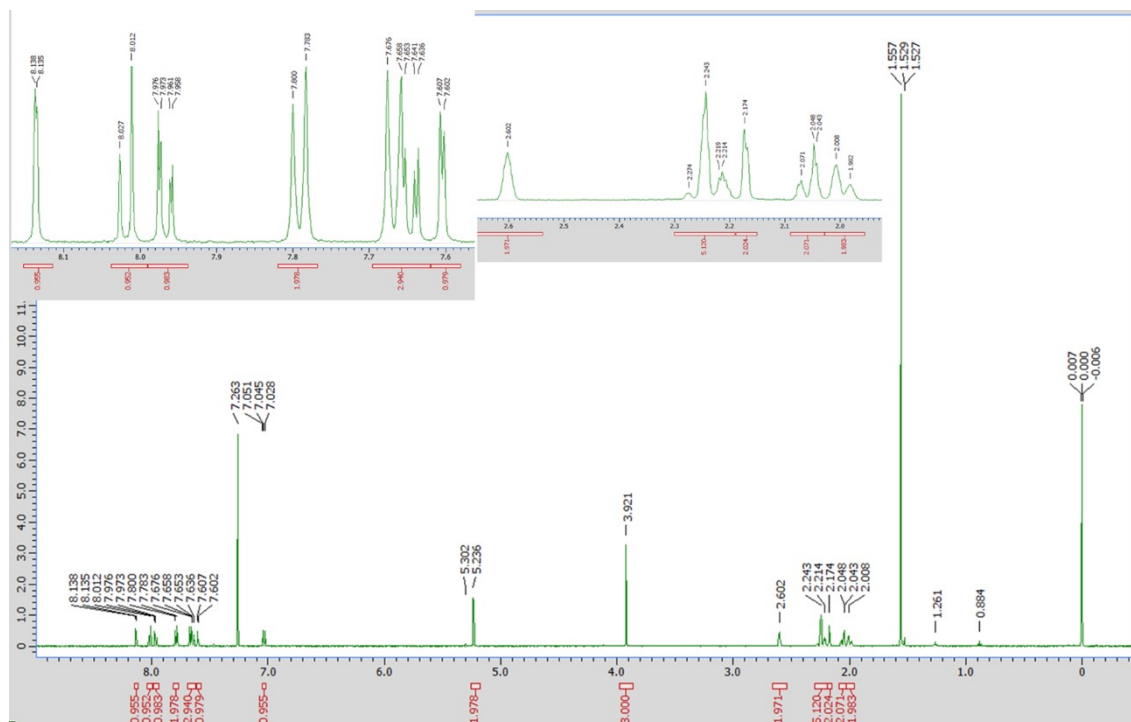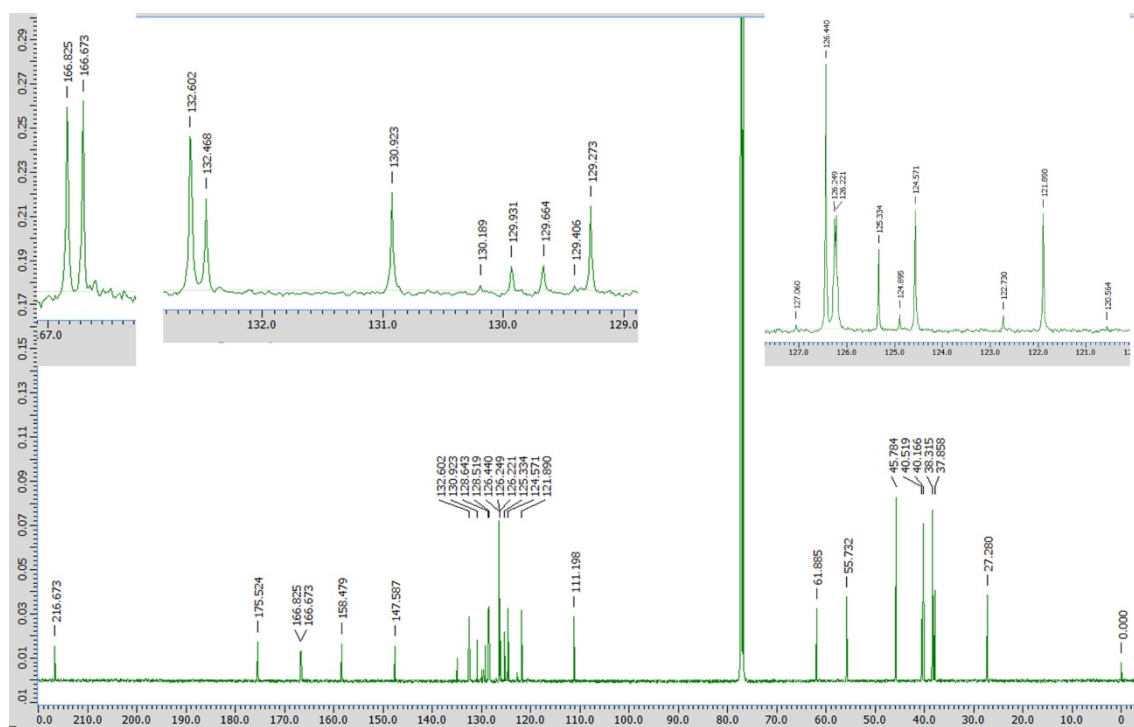

## References

1. W. Kabsch, *Acta Crystallogr. Sect. D* **2010**, *66*, 125-132.
2. O. V. Dolomanov, L. J. Bourhis, R. J. Gildea, J. A. K. Howard and H. Puschmann, *J. Appl. Crystallogr.* **2009**, *42*, 339–341.
3. G. M. Sheldrick, *Acta Crystallogr. Sect. A* **2015**, *A71*, 3–8.
4. G. M. Sheldrick, *Acta Crystallogr., Sect. C* **2015**, *71*, 3–8.
5. A. L. Spek, *Acta Crystallogr. Sect. C* **2015**, *71*, 9–18.
6. M. J. Frisch, G. W. Trucks, H. B. Schlegel, G. E. Scuseria, M. A. Robb, J. R. Cheeseman, G. Scalmani, V. Barone, G. A. Petersson, H. Nakatsuji, X. Li, M. Caricato, A. V. Marenich, J. Bloino, B. G. Janesko, R. Gomperts, B. Mennucci, H. P. Hratchian, J. V. Ortiz, A. F. Izmaylov, J. L. Sonnenberg, D. Williams-Young, F. Ding, F. Lipparini, F. Egidi, J. Goings, B. Peng, A. Petrone, T. Henderson, D. Ranasinghe, V. G. Zakrzewski, J. Gao, N. Rega, G. Zheng, W. Liang, M. Hada, M. Ehara, K. Toyota, R. Fukuda, J. Hasegawa, M. Ishida, T. Nakajima, Y. Honda, O. Kitao, H. Nakai, T. Vreven, K. Throssell, J. A. Montgomery, Jr., J. E. Peralta, F. Ogliaro, M. J. Bearpark, J. J. Heyd, E. N. Brothers, K. N. Kudin, V. N. Staroverov, T. A. Keith, R. Kobayashi, J. Normand, K. Raghavachari, A. P. Rendell, J. C. Burant, S. S. Iyengar, J. Tomasi, M. Cossi, J. M. Millam, M. Klene, C. Adamo, R. Cammi, J. W. Ochterski, R. L. Martin, K. Morokuma, O. Farkas, J. B. Foresman and D. J. Fox, *Gaussian 16*, Revision C.01, Gaussian, Inc., Wallingford CT, **2016**.
7. A. D. Becke, *J. Chem. Phys.* **1993**, *98*, 5648–5652.
8. C. T. Lee, W. T. Yang and R. G. Parr, *Phys. Rev. B* **1988**, *37*, 785–789.
9. P. J. Stephens, F. J. Devlin, C. F. Chabalowski and M. J. Frisch, *J. Phys. Chem.* **1994**, *98*, 11623–11627.
10. R. Dennington, T. A. Keith and J. M. Millam, *GaussView*, Version 6.1, Semichem Inc., Shawnee Mission KS, **2016**.
11. J. Nishida, H. Ohura, Y. Kita, H. Hasegawa, T. Kawase, N. Takada, H. Sato, Y. Sei and Y. Yamashita, *J. Org. Chem.* **2016**, *81*, 433-441.
12. W. J. Le Noble, S. Srivastava and C. K. Cheung, *J. Org. Chem.* **1983**, *48*, 1099–1101.
13. V. Barton, S. A. Ward, J. Chadwick, A. Hill and P. M. O'Neill, *J. Med. Chem.* **2010**, *53*, 4555–4559.
